# Supplementary material for: Robust and efficient annotation of cell states through gene signature scoring
Source: Genome Res. 2026 Mar;36(3):630–44. doi: 10.1101/gr.280926.125 (PMC12951948; doi:10.1101/gr.280926.125)
Supplement: Supplement 3 [file Supplemental_Table_S5.xlsx]

## Sheet: Legend Suppl. Figure S5
Supplemental Table S5: Gene signatures for each dataset used in the comparable score range experiment.

## Sheet: pbmc_b_mono_nk
B	Mono	NK
1-Mar	1-Mar	7-Sep
ACTG1	ABI3	ABHD17A
ADAM28	AC007952.4	ACTB
ADK	AC020656.1	ACTN4
AFF3	AC245014.3	ADGRG1
AIM2	ACAP2	AES
ALG5	ACSL1	AKR1C3
ALYREF	ACTB	ALYREF
ANAPC11	ACTR2	ANP32B
ANAPC5	ACTR3	ANP32E
ANP32B	ADA2	ANXA6
ANP32E	ADGRE2	APMAP
ANXA2	ADGRE5	APOBEC3G
APOBEC3C	AGTRAP	ARAP2
APOBEC3G	AHNAK	AREG
AQP3	AIF1	ARL4C
ARF1	ALDH2	ARPC2
ARF4	ANPEP	ARPC5L
ARHGAP24	ANXA1	ASPM
ARHGDIA	ANXA2	ATAD2
ARID3A	ANXA5	ATAD5
ARID5B	AOAH	ATP1B3
ASPM	AP1S2	B2M
ATAD2	AP2S1	BANF1
ATAD5	APLP2	BAZ1B
ATF4	APOBEC3A	BHLHE40
ATP2A2	ARHGAP26	BIN2
ATP5F1A	ARPC1B	BIRC5
ATP5F1B	ARPC2	BLOC1S1
ATP5F1C	ARPC3	BRCA1
ATP5MC1	ARPC5	BRCA2
ATP5MC3	ARRB2	BUB3
ATP5ME	ASAH1	C12orf75
ATP5MF	ASGR1	C1orf21
ATP5MG	ATG3	CACYBP
ATP5PF	ATP1B3	CALM1
ATP5PO	ATP2B1-AS1	CALM3
ATP6V0B	ATP5F1B	CALR
AUP1	ATP5MPL	CARHSP1
AURKAIP1	ATP6AP2	CBX3
BACH2	ATP6V0B	CBX5
BANK1	ATP6V0D1	CCDC167
BASP1	ATP6V1B2	CCDC28B
BCL11A	ATP6V1F	CCL4
BCL7A	BACH1	CCL5
BIRC3	BCL2A1	CCND3
BIRC5	BCL6	CD160
BLK	BID	CD2
BTG1	BLOC1S1	CD247
BUB1	BLVRA	CD300A
C12orf75	BLVRB	CD38
C1QBP	BNIP3L	CD47
CACYBP	BRI3	CD63
CALR	BST1	CD7
CALU	BTG2	CD81
CANX	C19orf38	CD99
CARHSP1	C1orf162	CDT1
CASP3	C3AR1	CENPE
CBX3	C4orf48	CENPF
CBX5	C5AR1	CENPH
CCDC167	C9orf72	CENPK
CCDC32	CALHM6	CENPM
CCDC50	CALM2	CENPU
CCNA2	CAMK1	CENPX
CCNB1	CAP1	CEP78
CCNB2	CAPG	CFL1
CCNC	CAPNS1	CHAF1A
CCT2	CAPZA1	CHCHD2
CCT6A	CAPZA2	CHEK1
CCT7	CARD16	CHST12
CCT8	CASP1	CHST2
CD22	CAST	CKS1B
CD24	CCDC88A	CKS2
CD27	CCL3	CLEC2B
CD37	CCL3L1	CLIC1
CD38	CCNL1	CLIC3
CD40	CCNY	CLSPN
CD52	CD14	CMC1
CD72	CD163	COX5A
CD74	CD300A	COX6C
CD79A	CD300E	COX8A
CD79B	CD302	CST7
CD82	CD36	CTSC
CDCA7L	CD4	CTSW
CDK1	CD44	CX3CR1
CDK2AP2	CD55	CXXC5
CDKN3	CD63	CYBA
CENPE	CD68	DBI
CENPF	CD74	DDIT4
CENPM	CD79B	DDX39A
CENPU	CD83	DEK
CENPW	CD93	DHFR
CHCHD10	CDA	DHRS7
CHCHD2	CDC42EP3	DIP2A
CISD2	CDKN1A	DNAJC9
CKAP4	CDKN1C	DNMT1
CKS1B	CEBPB	DSTN
CKS2	CEBPD	DTYMK
CLIC1	CFD	DUSP2
CLINT1	CFL1	DUT
CLPTM1L	CFP	E2F1
CLSPN	CHCHD10	EBP
CNPY2	CKB	EFHD2
COBLL1	CLEC12A	EIF3G
COPB1	CLEC4A	ENO1
COPB2	CLEC4E	ETS1
COPE	CLEC7A	EVL
COX17	CLIC1	EZH2
COX5A	CMTM6	FAM111A
COX6A1	CNPY3	FAM111B
COX6B1	COMT	FAM49B
COX6C	CORO1A	FANCI
COX7A2	COTL1	FCER1G
COX7B	COX5B	FCGR3A
COX8A	COX7B	FCRL6
CPNE5	COX8A	FDPS
CRELD2	CPPED1	FEN1
CRIP1	CPVL	FGFBP2
CTSH	CREB5	FUS
CXCR4	CREG1	FYN
CXXC5	CRTAP	GAPDH
CYB561A3	CSF1R	GATA3
CYBA	CSF3R	GINS2
CYC1	CSK	GMNN
CYCS	CST3	GNG2
CYTOR	CSTA	GNLY
DAD1	CSTB	GNPTAB
DBF4	CTSA	GPR65
DBI	CTSB	GSTP1
DCPS	CTSC	GZMA
DDOST	CTSD	GZMB
DDT	CTSH	GZMH
DDX39A	CTSL	GZMK
DERL1	CTSS	GZMM
DERL3	CTSZ	H2AFV
DLGAP5	CUX1	H2AFX
DNAJB11	CX3CR1	H2AFZ
DNAJC15	CXCL16	HCST
DNAJC3	CXCL8	HELLS
DNAJC9	CYBA	HIRIP3
DTYMK	CYBB	HIST1H1B
DUT	CYP1B1	HIST1H1C
DYNLL1	DAZAP2	HIST1H1D
EAF2	DDX3X	HIST1H4C
EBLN3P	DMXL2	HLA-A
EBNA1BP2	DOCK2	HLA-B
EBP	DPYD	HLA-C
EDEM1	DPYSL2	HLA-E
EEF1B2	DRAP1	HMGB1
EIF1AX	DUSP1	HMGB2
EIF2S2	DUSP6	HMGN1
EIF3A	EFHD2	HMGN2
EIF4A3	EGR1	HMGN3
EIF4G1	EHBP1L1	HNRNPA2B1
EIF5A	ELOB	HNRNPA3
EIF5B	EMILIN2	HNRNPAB
ELL2	EMP3	HNRNPD
ELOC	ENTPD1	HNRNPF
EMC7	ETS2	HNRNPR
ENO1	EVI2A	HOPX
EPRS	EVI2B	HSP90AA1
ERH	FAM110A	ID2
ERLEC1	FAM120A	IDH2
ERP29	FAM198B	IFI16
EZH2	FAM49A	IFITM2
EZR	FBXL5	IGFBP7
FABP5	FCER1G	IL18R1
FAM129C	FCGR2A	IL18RAP
FBXO5	FCGR3A	IL2RB
FCER2	FCGRT	IL2RG
FCMR	FCN1	IL32
FCRL1	FGD2	ITGAL
FCRL2	FGL2	ITGB1
FCRL3	FGR	ITGB2
FCRL5	FKBP1A	JAK1
FCRLA	FLNA	JPT1
FDPS	FMNL1	KIF20B
FDX1	FOS	KLRB1
FEN1	FOSB	KLRC1
FKBP11	FPR1	KLRC2
FKBP2	FTH1	KLRD1
FOXP1	FTL	KLRF1
GABPB1-AS1	G0S2	KNL1
GADD45GIP1	GAPDH	LBR
GALNT1	GAS7	LCP1
GAPDH	GCA	LDHA
GGH	GDI2	LIG1
GHITM	GLIPR1	LINC01871
GINS2	GLIPR2	LITAF
GLCCI1	GLRX	LMNB1
GLRX5	GLUL	LSM3
GMNN	GMFG	LSM4
GMPPB	GNAI2	LY6E
GNAS	GNAQ	MACF1
GNG7	GNB2	MAD2L1
GNL3	GNG5	MAP3K8
GOLGB1	GNS	MATK
GPR183	GPBAR1	MAZ
GSPT1	GPCPD1	MBP
GTF3C6	GRB2	MCM3
GTSE1	GRINA	MCM4
H2AFV	GRK3	MCM5
H2AFX	GRN	MCM6
H2AFZ	GSTO1	MCM7
HAX1	GSTP1	MKI67
HDLBP	H2AFY	MSN
HELLS	H2AFZ	MT2A
HERPUD1	H3F3A	MYBL1
HIBCH	HCK	MYL12A
HIST1H1B	HCLS1	MYOM2
HIST1H1C	HES4	MZT2B
HIST1H1D	HIF1A	NAA38
HIST1H2AH	HLA-DMA	NAP1L4
HIST1H3B	HLA-DMB	NASP
HIST1H3G	HLA-DPA1	NCAM1
HIST1H4C	HLA-DPB1	NCAPD3
HIST2H2AC	HLA-DQA1	NCL
HLA-DMA	HLA-DQB1	NCR3
HLA-DMB	HLA-DRA	NDUFB2
HLA-DOB	HLA-DRB1	NDUFB7
HLA-DPA1	HLA-DRB5	NKG7
HLA-DPB1	HMOX1	NOP56
HLA-DQA1	HNMT	NSD2
HLA-DQB1	HSBP1	NUCB2
HLA-DRA	IER2	NUCKS1
HLA-DRB1	IER3	NUDT1
HLA-DRB5	IER5	NUSAP1
HM13	IFI30	OSTF1
HMGA1	IFITM2	PA2G4
HMGB1	IFITM3	PARK7
HMGB2	IFNGR1	PARP1
HMGB3	IFNGR2	PAXX
HMGN1	IGSF6	PCLAF
HMGN2	IL10RA	PCNA
HMGN3	IL17RA	PDIA3
HMMR	IL1B	PDIA6
HNRNPA3	IQGAP1	PFN1
HNRNPAB	IRAK3	PHF19
HNRNPD	IRF1	PIK3R1
HNRNPR	IRF2BP2	PIP4K2A
HRASLS2	ISG15	PLAC8
HSH2D	ITGAL	PLEK
HSP90AA1	ITGAM	PPDPF
HSP90B1	ITGAX	PPIA
HSPA5	ITGB2	PPM1G
HSPA8	ITM2B	PPP1CA
HSPB11	JAML	PPP2R5C
HSPD1	JPT1	PRDM1
HSPE1	JUNB	PRF1
HVCN1	KCTD12	PRKCH
HYOU1	KLF10	PRKDC
IDH2	KLF6	PRMT2
IFT57	LAMP2	PRSS23
IGHA1	LAMTOR1	PSIP1
IGHA2	LAMTOR4	PSMA7
IGHD	LAPTM5	PSMB8
IGHG1	LCP1	PSMB9
IGHG3	LFNG	PSMC3
IGHM	LGALS1	PSMD8
IGKC	LGALS2	PSME2
IGLC2	LGALS3	PTGDR
IGLC3	LGALS9	PTMA
IKZF3	LILRA1	PTPN12
IL4R	LILRA2	PTPN4
ILF2	LILRA5	PTPRC
IRF4	LILRB1	PTTG1
IRF8	LILRB2	PYHIN1
ISG20	LILRB3	RAC2
ISOC2	LMO2	RAD21
ITGB1	LRP1	RAD51AP1
ITGB7	LRRC25	RALY
ITM2C	LRRFIP1	RAN
JCHAIN	LRRK2	RANBP1
JPT1	LSP1	RAP1B
JTB	LST1	RARRES3
JUN	LTA4H	RBBP4
JUND	LY6E	RBBP7
KDELR2	LY86	RECQL
KIF11	LY96	RFC1
KIF20B	LYN	RHOC
KLF2	LYST	RNASEH2C
KNL1	LYZ	RNF213
KPNA2	MAFB	RORA
LAPTM5	MAPKAPK3	RPA2
LBR	MARCKS	RPA3
LDHA	MARCKSL1	RRM1
LINC00926	MBD2	RRM2
LINC01781	MCL1	RUNX3
LINC01857	MEF2C	S1PR5
LINC02397	MEGF9	SAMD3
LMAN1	METTL9	SELL
LMAN2	MGAT1	SERBP1
LMNB1	MGST1	SET
LRRC59	MIDN	SH2D1B
LSM3	MIS18BP1	SIVA1
LSM5	MNDA	SKAP1
LSM7	MOB1A	SLBP
LTB	MPEG1	SLC25A5
MAD2L1	MS4A4A	SLC9A3R1
MAN1A1	MS4A6A	SLFN13
MANF	MS4A7	SMC1A
MBD4	MSN	SMC2
MCM3	MT2A	SMC3
MCM4	MTPN	SMC4
MCM5	MTSS1	SNRNP25
MCM7	MXD1	SNRPB
MCUR1	MYADM	SNRPD1
MEF2C	MYD88	SNRPD3
MESD	MYL6	SNRPF
MIF	MYO1F	SPN
MKI67	MYO1G	SPON2
MLEC	NAAA	SPTSSB
MRPL12	NAGK	SRSF10
MRPL22	NAIP	SRSF2
MRPL51	NAMPT	SRSF3
MRPL52	NAP1L1	SRSF7
MRPS34	NCF1	SSRP1
MRPS6	NCF2	STK17A
MS4A1	NCOA4	STMN1
MTDH	NEAT1	SUMO2
MTHFD2	NFKBIA	SUN2
MTPN	NFKBID	SUPT16H
MYBL2	NFKBIZ	SUZ12
MYDGF	NINJ1	SYNE1
MZB1	NLRP3	SYNE2
MZT2B	NOTCH2	SYTL3
NANS	NPC2	TBX21
NASP	NR4A1	TCF7
NCF1	NRGN	TFDP2
NCL	NUMB	TGFBR3
NCOA3	NUP214	THRAP3
NDUFA13	OAS1	TK1
NDUFA6	OAZ1	TMEM106C
NDUFAB1	OGFRL1	TMPO
NDUFB10	OSCAR	TNFRSF18
NDUFB11	PABPC1	TOP2A
NDUFB3	PAK1	TOPBP1
NDUFB4	PCBP1	TPI1
NDUFB6	PECAM1	TPM3
NDUFB7	PFN1	TPR
NDUFB8	PGD	TPST2
NDUFC2	PGK1	TPX2
NDUFS6	PGLS	TRBC1
NDUFV2	PICALM	TRDC
NME1	PIK3AP1	TRGC1
NOL7	PILRA	TSC22D3
NOP10	PIM3	TTC38
NOP56	PKM	TUBA1B
NPM1	PLAUR	TUBB
NT5DC2	PLBD1	TUBB4B
NUCB2	PLEK	TXK
NUCKS1	PLEKHO1	TYMS
NUSAP1	PLSCR1	UBB
ODC1	PLXDC2	UBE2S
ORAI2	POU2F2	USP1
OSBPL10	PPP1R15A	UTRN
OST4	PPT1	WDR76
OSTC	PRAM1	XCL1
P2RX5	PRELID1	XCL2
P4HB	PSAP	XRCC5
PARK7	PSMA4	YBX1
PARP1	PSMB9	YWHAQ
PAX5	PSME2	YWHAZ
PCLAF	PTAFR	ZAP70
PCNA	PTGES3	ZFP36L2
PDCD5	PTP4A2	ZWINT
PDIA3	PTPN6
PDIA4	PTPRC
PDIA6	PTPRE
PDLIM1	PYCARD
PEBP1	PYGL
PGAM1	QKI
PHB	RAB10
PHF19	RAB11FIP1
PHPT1	RAB31
PIM2	RAB32
PLAC8	RAB8A
PLEKHA2	RABGAP1L
PLPP5	RAC1
PMVK	RAP1B
POLR2L	RASSF2
POMP	RASSF4
POU2AF1	RBP7
POU2F2	RBX1
PPA1	REL
PPIA	RGS19
PPIB	RGS2
PPM1G	RHOA
PPP1R14B	RHOB
PRDM1	RHOC
PRDM2	RHOG
PRDX1	RHOQ
PRDX2	RILPL2
PRDX4	RNASE6
PRDX5	RNASET2
PRELID1	RNF13
PRKCB	RNF130
PRKDC	RNF149
PRMT1	RNH1
PSMA2	RRAS
PSMA3	RTN3
PSMA4	RTN4
PSMA5	RXRA
PSMA7	S100A10
PSMB1	S100A11
PSMB2	S100A12
PSMB3	S100A4
PSMB6	S100A6
PSMB8	S100A8
PSMD14	S100A9
PSMD2	SAMHD1
PSMD8	SAT1
PSME2	SCIMP
PTMA	SCPEP1
PTPN1	SDCBP
PTTG1	SEC11A
RABAC1	SEC14L1
RAD21	SECTM1
RALGPS2	SERP1
RAN	SERPINA1
RANBP1	SERPINB1
RBM3	SGK1
RBX1	SH3BGRL
REEP5	SH3BGRL3
REL	SH3BP2
RER1	SHTN1
RHOQ	SIGLEC10
RNASEH2C	SIRPA
ROMO1	SKAP2
RPA3	SLC11A1
RPL13A	SLC25A5
RPL18A	SLC25A6
RPL22L1	SLC2A3
RPL23A	SLC2A6
RPL27A	SLC43A2
RPL36AL	SLC7A7
RPL8	SLC8A1
RPLP0	SMAP2
RPLP2	SMIM25
RPN1	SNX10
RPN2	SNX18
RPS11	SNX2
RPS18	SOCS3
RPS19BP1	SOD2
RPS20	SPI1
RPS23	SPN
RPS27	SRGN
RPS29	STX11
RPS5	STXBP2
RPS8	SULF2
RPSA	SULT1A1
RRBP1	SYK
RRM1	SYNGR2
RRM2	TALDO1
SAR1B	TBXAS1
SDF2L1	TCF7L2
SEC11A	TCIRG1
SEC11C	TESC
SEC14L1	TET2
SEC24D	TGFBI
SEC61A1	THEMIS2
SEC61B	TIMP1
SEC61G	TIMP2
SEC62	TKT
SEC63	TLR2
SEL1L	TLR4
SEL1L3	TMBIM4
SELENOK	TMEM154
SELENOS	TMEM167A
SERBP1	TMEM176B
SERP1	TMPO
SET	TNFAIP2
SF3B5	TNFRSF1B
SHCBP1	TNFSF10
SIVA1	TNFSF13B
SKA2	TPI1
SLAMF7	TPM3
SLC25A3	TPP1
SLC25A4	TSPO
SLC25A5	TUBA1A
SLC35B1	TUBA1B
SLC44A1	TYMP
SMAP2	TYROBP
SMARCB1	UBE2D1
SMC2	UNC119
SMC4	UNC93B1
SMIM14	USP15
SND1	USP3
SNRNP25	UTRN
SNRPB	VAMP5
SNRPD1	VAMP8
SNRPD3	VASP
SNRPE	VCAN
SNRPF	VIM
SNRPG	VMP1
SNU13	VPS29
SNX2	VPS35
SNX29	VSIR
SP100	WARS
SP110	WASF2
SP140	WSB1
SPATS2	YBX1
SPCS1	YBX3
SPCS2	ZBTB7A
SPCS3	ZEB2
SPIB	ZFAND5
SRM	ZFP36
SRP54	ZFP36L1
SRP72	ZNF106
SRPRA	ZNF385A
SRPRB	ZNF706
SRSF10	ZYX
SRSF2
SRSF3
SRSF9
SSPN
SSR1
SSR2
SSR3
SSR4
SSRP1
STK17A
STMN1
STOML2
STRBP
STT3A
STT3B
STX7
SUB1
SUZ12
SWAP70
TAGLN2
TCF3
TCF4
TCL1A
TCP1
TENT5C
TFDP1
TIMM8B
TK1
TMBIM6
TMED10
TMED2
TMED9
TMEM156
TMEM208
TMEM258
TMPO
TMSB10
TNFRSF13B
TNFRSF13C
TNFRSF17
TOP1
TOP2A
TP53INP1
TPD52
TPI1
TPX2
TRAM1
TSC22D3
TSPAN13
TUBA1B
TUBB
TUBB4B
TUFM
TXN
TXNDC11
TXNDC17
TXNDC5
TXNIP
TXNL4A
TYMS
UBE2C
UBE2G1
UBE2J1
UBE2L3
UBE2N
UBE2S
UBXN4
UFD1
UQCC2
UQCRH
UQCRQ
USO1
USP1
VCP
VDAC1
VOPP1
VPREB3
XBP1
XRCC5
YBX1
YBX3
YWHAE
ZBP1
ZBTB38
ZCCHC7
ZNF706
ZWINT

## Sheet: pbmc_b_subtypes
B intermediate	B memory	B naive
1-Mar	1-Mar	1-Mar
ADAM28	ADAM28	ADAM28
AFF3	AIM2	ADK
AIM2	ARID5B	AFF3
ARHGAP24	BANK1	BACH2
BANK1	BASP1	BANK1
BCL11A	BCL11A	BCL11A
BIRC3	BLK	BCL7A
BLK	CCDC50	BIRC3
BTG1	CD22	BLK
CCDC50	CD24	BTG1
CD22	CD37	CD22
CD24	CD40	CD37
CD37	CD52	CD40
CD52	CD74	CD52
CD74	CD79A	CD72
CD79A	CD79B	CD74
CD79B	CD82	CD79A
CD82	CHCHD10	CD79B
COBLL1	COBLL1	CDCA7L
CXXC5	CPNE5	COBLL1
CYB561A3	CXXC5	CXCR4
EEF1B2	EEF1B2	CYB561A3
EZR	EZR	EAF2
FAM129C	GNG7	EBLN3P
FCMR	HLA-DMA	EZR
FCRL2	HLA-DMB	FAM129C
FCRL3	HLA-DPA1	FCER2
FCRL5	HLA-DPB1	FCMR
FCRLA	HLA-DQA1	FCRL1
FOXP1	HLA-DQB1	FCRL5
GPR183	HLA-DRA	GABPB1-AS1
HLA-DMA	HLA-DRB1	HLA-DMA
HLA-DMB	HLA-DRB5	HLA-DMB
HLA-DPA1	IGHA1	HLA-DOB
HLA-DPB1	IGHA2	HLA-DPA1
HLA-DQA1	IGHG1	HLA-DPB1
HLA-DQB1	IGHG3	HLA-DQA1
HLA-DRA	IGKC	HLA-DQB1
HLA-DRB1	IGLC2	HLA-DRA
HLA-DRB5	IGLC3	HLA-DRB1
IFT57	IKZF3	HLA-DRB5
IGHD	IRF8	HVCN1
IGHM	JCHAIN	IGHD
IGKC	LINC00926	IGHM
IGLC2	LINC01781	IGKC
IGLC3	LTB	IGLC2
IKZF3	MBD4	IGLC3
IRF8	MEF2C	IL4R
JCHAIN	MS4A1	IRF8
JUND	OSBPL10	ISG20
LINC00926	P2RX5	JUN
LINC01857	PDLIM1	JUND
LTB	POU2AF1	KLF2
MBD4	PRKCB	LAPTM5
MEF2C	RALGPS2	LINC00926
MS4A1	RPL13A	LINC02397
NCOA3	RPL23A	LTB
ORAI2	RPL27A	MEF2C
OSBPL10	RPL8	MS4A1
P2RX5	RPLP2	MTPN
PAX5	RPS11	NCF1
PDLIM1	RPS18	P2RX5
PLAC8	RPS20	PAX5
POU2AF1	RPS23	PLEKHA2
POU2F2	RPS27	PLPP5
PRDM2	RPS29	RALGPS2
PRKCB	RPS5	REL
PTPN1	RPS8	RPL13A
RALGPS2	RPSA	RPL18A
RPS11	SEL1L3	RPL8
RPS18	SNX2	RPS11
RPS23	SP110	RPS23
RPS27	SP140	RPS27
RPS5	SPIB	RPS5
SMARCB1	SSPN	RPSA
SMIM14	SWAP70	SEC62
SNX2	TCF4	SMAP2
SP100	TMEM156	SNX2
SP110	TNFRSF13B	SNX29
SP140	TNFRSF13C	SP100
SPIB	TSC22D3	STK17A
STRBP	TXNIP	STRBP
STX7	VPREB3	STX7
SWAP70		SWAP70
TCF4		TCF4
TNFRSF13B		TCL1A
TNFRSF13C		TNFRSF13C
TSC22D3		TPD52
VPREB3		TSC22D3
		TSPAN13
		TXNIP
		VPREB3
		YBX3
		ZCCHC7

## Sheet: pbmc_cd4_subtypes
CD4 CTL	CD4 Naive	CD4 Proliferating	CD4 TCM	CD4 TEM	Treg
ABHD17A	BCL11B	1-Sep	6-Sep	AES	ARID5B
ARL4C	C12orf57	6-Sep	ACTG1	ARL4C	C12orf57
B2M	C6orf48	ABRACL	AES	CALM1	C6orf48
C12orf75	CAMK4	ACAT2	AQP3	CCL5	CD27
CALM1	CCR7	ACTB	ARHGDIB	CD2	CD3D
CCL5	CD27	ACTG1	ARID5B	CD27	CD3G
CD2	CD3D	ACTR3	CD2	CD3D	EEF1B2
CD3D	CD3E	AES	CD27	CD3E	FOXP1
CD3E	CD3G	ALYREF	CD28	CD3G	GIMAP7
CD3G	EEF1B2	ANAPC11	CD3D	CD69	IL32
CD52	EIF3E	ANAPC15	CD3E	CD96	LDHB
CD99	ETS1	ANP32A	CD3G	CXCR4	LEF1
CLEC2D	FHIT	ANP32B	CD52	DUSP2	LTB
CST7	FOXP1	ANP32E	CD6	EEF1B2	NOP53
DSTN	GIMAP7	ANXA2	CD69	EML4	NPM1
FGFBP2	IL6ST	ANXA5	CLDND1	ETS1	PIK3IP1
GNLY	IL7R	AP2S1	CNN2	GZMA	RCAN3
GZMA	LDHB	AQP3	CORO1B	GZMK	RPL10
GZMH	LEF1	ARHGAP11A	EPB41	IL32	RPL10A
GZMM	LEPROTL1	ARHGDIA	ETS1	IL7R	RPL11
HCST	LINC00861	ARHGDIB	EVL	ITGA4	RPL12
HOPX	LTB	ARL6IP1	FAM107B	ITM2A	RPL13
IL32	MAL	ARPC1B	FYB1	KLF2	RPL13A
IL7R	NOP53	ARPC2	GBP2	KLRB1	RPL14
ITGB1	NOSIP	ARPC4	GIMAP4	LDHB	RPL17
LYAR	NPM1	ARPC5	GMFG	LTB	RPL18
MAF	OXNAD1	ASF1B	GPR183	LYAR	RPL18A
MYBL1	PIK3IP1	ASPM	GSTK1	MDFIC	RPL21
NKG7	RCAN3	ATAD2	GYPC	ODF2L	RPL22
PPP2R5C	RGS10	ATAD5	HINT1	PAG1	RPL24
PRF1	RPL10	ATP5F1A	HSPA8	PDE4D	RPL3
RORA	RPL10A	ATP5F1B	IL2RG	PIK3R1	RPL30
S100A4	RPL11	ATP5F1C	IL32	RORA	RPL32
SAMD3	RPL12	ATP5IF1	IL7R	RPL10A	RPL34
SH3BGRL3	RPL13	ATP5MC3	ISG20	RPL13A	RPL35A
SYNE1	RPL13A	ATP5MF	ITGB1	RPL14	RPL36
SYNE2	RPL14	ATP5MG	ITM2A	RPL3	RPL37
TRAC	RPL18	ATP5PB	KLRB1	RPLP0	RPL38
TRBC1	RPL18A	ATP5PF	LAT	RPS12	RPL39
TRGC2	RPL19	AURKAIP1	LCK	RPS18	RPL5
YWHAQ	RPL21	BAZ1B	LDHB	RPS25	RPL7
	RPL22	BIRC5	LEPROTL1	RPS29	RPL9
	RPL23	BLOC1S1	LIMS1	RPS3	RPLP2
	RPL23A	BRCA1	LTB	RPS4X	RPS10
	RPL24	BRCA2	MAF	RPS6	RPS12
	RPL27A	BUB3	MAL	RPSA	RPS13
	RPL3	C12orf75	MCUB	SPOCK2	RPS15
	RPL30	C1QBP	MZT2A	SYNE2	RPS15A
	RPL31	CACYBP	NOSIP	TCF7	RPS16
	RPL32	CALM1	OCIAD2	TPT1	RPS17
	RPL34	CALM3	OPTN	TRAC	RPS18
	RPL35A	CALR	PBXIP1	TRADD	RPS20
	RPL36	CAP1	PDE4D	TRAT1	RPS21
	RPL37	CAPZA1	PFN1	TRBC2	RPS25
	RPL38	CAPZB	PPP2R5C	TSC22D3	RPS26
	RPL39	CARHSP1	RAC2	TTC39C	RPS27
	RPL5	CBX3	RCAN3	TXNIP	RPS27A
	RPL7	CBX5	RGS10	ZFP36L2	RPS28
	RPL9	CCDC167	RORA		RPS29
	RPLP0	CCNA2	RPL13		RPS3
	RPLP2	CCNB1	RPL13A		RPS3A
	RPS10	CCNB2	RPL14		RPS4Y1
	RPS12	CCT5	RPL3		RPS5
	RPS13	CCT6A	RPL30		RPS6
	RPS14	CCT8	RPL32		RPS8
	RPS15A	CD2	RPL36		RPSA
	RPS16	CD28	RPL36A		RTKN2
	RPS18	CD3D	RPL9		SARAF
	RPS20	CD3G	RPLP0		TIGIT
	RPS21	CD52	RPS10		TRAC
	RPS23	CD6	RPS12		TRBC2
	RPS25	CD99	RPS15A
	RPS27	CDC25B	RPS18
	RPS27A	CDCA7	RPS20
	RPS28	CDK1	RPS25
	RPS29	CDK2AP2	RPS26
	RPS3	CDKN3	RPS27
	RPS3A	CDT1	RPS27A
	RPS4X	CENPE	RPS29
	RPS5	CENPF	RPS3
	RPS6	CENPK	RPS3A
	RPS8	CENPM	RPS4X
	RPSA	CENPU	RPS6
	SARAF	CENPW	RPS8
	SATB1	CENPX	RPSA
	SNHG8	CEP55	S1PR4
	TCF7	CFL1	SARAF
	TOMM7	CHCHD1	SKAP1
	TPT1	CHCHD2	SLFN5
	TRABD2A	CHD4	SPOCK2
	TRAC	CHEK1	SUB1
	TRBC2	CKAP2	TCF7
		CKS1B	TMSB10
		CKS2	TMSB4X
		CLDND1	TOB1
		CLSPN	TRAC
		CLTA	TRAF3IP3
		CNN2	TRBC2
		COPS3	UCP2
		CORO1A	ZFP36L2
		CORO1B
		COTL1
		COX17
		COX5A
		COX6A1
		COX6B1
		COX6C
		COX7A2
		COX7B
		COX8A
		CRIP1
		CYTOR
		DAZAP1
		DBF4
		DBI
		DCTN3
		DDX39A
		DECR1
		DEK
		DHFR
		DLGAP5
		DNAJC8
		DNAJC9
		DNMT1
		DTYMK
		DUT
		DYNLL1
		EBP
		EID1
		EIF2S2
		EIF3A
		EIF3I
		EIF4A3
		EIF5A
		ELOC
		ENO1
		ERH
		ESYT1
		ETFB
		ETS1
		EZH2
		EZR
		FABP5
		FAM107B
		FAM111B
		FANCI
		FBXO5
		FDPS
		FEN1
		FKBP3
		FLNA
		GAPDH
		GBP1
		GBP2
		GGCT
		GIMAP4
		GINS2
		GLRX5
		GMFG
		GMNN
		GNG5
		GTF3C6
		GTSE1
		GUK1
		H2AFV
		H2AFX
		H2AFY
		H2AFZ
		H3F3A
		HDAC1
		HDGF
		HELLS
		HINT1
		HIST1H1B
		HIST1H1C
		HIST1H1D
		HIST1H4C
		HIST2H2AC
		HMGA1
		HMGB1
		HMGB2
		HMGB3
		HMGN1
		HMGN2
		HMMR
		HNRNPA1
		HNRNPA2B1
		HNRNPA3
		HNRNPAB
		HNRNPC
		HNRNPD
		HNRNPF
		HNRNPM
		HNRNPR
		HNRNPU
		HSP90AA1
		HSPA8
		HSPB11
		HSPD1
		HSPE1
		IDH2
		IFI16
		IL2RG
		IL32
		ILF2
		ISG15
		ITGB1BP1
		ITM2A
		JPT1
		KHDRBS1
		KIF11
		KIF15
		KIF20B
		KIF22
		KIF2A
		KNL1
		KPNA2
		LAT
		LBR
		LCK
		LCP1
		LDHA
		LDHB
		LIG1
		LIMS1
		LMNB1
		LSM2
		LSM3
		LSM4
		LSM5
		LSM7
		LY6E
		MAD2L1
		MAZ
		MCM3
		MCM4
		MCM5
		MCM6
		MCM7
		MCUB
		MDH1
		MINOS1
		MIR4435-2HG
		MKI67
		MPC2
		MRPL11
		MRPL13
		MRPL51
		MRPL52
		MRPL54
		MT1E
		MT2A
		MYBL2
		MYH9
		MYL6
		MZT1
		MZT2A
		MZT2B
		NAP1L1
		NAP1L4
		NASP
		NCAPD2
		NCAPD3
		NCAPG
		NCL
		NDC80
		NDUFA1
		NDUFA12
		NDUFA13
		NDUFA2
		NDUFA4
		NDUFA6
		NDUFAB1
		NDUFB1
		NDUFB10
		NDUFB11
		NDUFB3
		NDUFB4
		NDUFB6
		NDUFB8
		NDUFB9
		NDUFC2
		NDUFS5
		NDUFS6
		NDUFV2
		NONO
		NOSIP
		NPM1
		NSD2
		NUCKS1
		NUDT1
		NUDT21
		NUF2
		NUSAP1
		OCIAD2
		OPTN
		PA2G4
		PARK7
		PARP1
		PCLAF
		PCNA
		PDCD5
		PDIA6
		PFN1
		PGAM1
		PHB2
		PHF19
		PMVK
		POMP
		PPA1
		PPIA
		PPM1G
		PPP1CA
		PPP1CC
		PRDX1
		PRDX2
		PRDX3
		PRKDC
		PSIP1
		PSMA1
		PSMA2
		PSMA3
		PSMA4
		PSMA5
		PSMA7
		PSMB1
		PSMB2
		PSMB3
		PSMB6
		PSMB8
		PSMB9
		PSMC3
		PSMC5
		PSMD14
		PSMD7
		PSMD8
		PSME1
		PSME2
		PTGES3
		PTMA
		PTTG1
		RAC2
		RAD21
		RALY
		RAN
		RANBP1
		RBBP7
		RBX1
		RECQL
		RFC4
		RNASEH2B
		RORA
		RPA1
		RPA3
		RPLP0
		RPSA
		RRM1
		RRM2
		RTRAF
		RUVBL1
		S100A10
		S1PR4
		SEC61B
		SEC61G
		SEM1
		SERBP1
		SET
		SF3B6
		SFXN1
		SGO2
		SH2D1A
		SIVA1
		SKA2
		SLBP
		SLC25A3
		SLC25A5
		SLC9A3R1
		SMC1A
		SMC2
		SMC3
		SMC4
		SMS
		SNRNP25
		SNRPB
		SNRPB2
		SNRPD1
		SNRPD2
		SNRPD3
		SNRPE
		SNRPF
		SNRPG
		SOD1
		SPCS2
		SPOCK2
		SPTBN1
		SRP9
		SRSF10
		SRSF2
		SRSF3
		SRSF4
		SRSF9
		SSRP1
		STMN1
		SUB1
		SUMO1
		SUMO2
		SUPT16H
		TACC3
		TAGLN2
		TCEA1
		TCP1
		TFDP1
		TK1
		TMA7
		TMEM14B
		TMPO
		TMSB10
		TMSB4X
		TOP2A
		TOPBP1
		TPI1
		TPM3
		TPM4
		TPR
		TPX2
		TRAC
		TRBC2
		TROAP
		TUBA1B
		TUBA1C
		TUBB
		TUBB4B
		TXN
		TXNDC17
		TXNL4A
		TYMS
		UBE2C
		UBE2D2
		UBE2L3
		UBE2N
		UBE2S
		UBE2T
		UBL5
		UCP2
		UFD1
		UQCR10
		UQCRFS1
		UQCRH
		UQCRQ
		USP1
		VDAC1
		VDAC3
		VIM
		VPS29
		WDR1
		WDR76
		XRCC5
		XRCC6
		YBX1
		YEATS4
		YWHAE
		YWHAH
		YWHAQ
		YWHAZ
		ZWINT

## Sheet: pbmc_cd8_subtypes
CD8 Naive	CD8 Proliferating	CD8 TCM	CD8 TEM
6-Sep	7-Sep	CCL5	7-Sep
ACTG1	ABHD17A	CD2	ABHD17A
C12orf57	ACTB	CD27	ADGRG1
C6orf48	ACTG1	CD3D	APOBEC3G
CCR7	ACTN4	CD3E	ARID5B
CD2	ACTR3	CD3G	ARL4C
CD27	AES	CD8A	ATM
CD3D	ALYREF	CD8B	B2M
CD3E	ANP32B	CD96	BTG1
CD3G	ANP32E	CXCR4	C12orf75
CD8A	ANXA6	EEF1B2	C1orf21
CD8B	APOBEC3G	GATA3	CALM1
CLEC2D	ARHGDIA	HOPX	CCL4
EEF1B2	ARPC2	IL32	CCL5
EIF3E	ARPC5L	IL7R	CD2
ETS1	ATAD2	ITGA4	CD247
EVL	ATAD5	ITGB1	CD27
FYB1	ATP1B3	KLF2	CD3D
GPR155	ATP5IF1	LDHB	CD3E
GYPC	ATP5MC3	LEPROTL1	CD3G
IL32	ATP5MF	LTB	CD52
IL7R	BAZ1B	LYAR	CD69
LAT	BIRC5	NOSIP	CD7
LBH	BLOC1S1	RORA	CD81
LCK	BRCA1	RPL10A	CD8A
LDHB	C12orf75	RPL12	CD8B
LEF1	CACYBP	RPL13	CD99
LEPROTL1	CALM1	RPL13A	CEP78
LINC02446	CALM3	RPL14	CLEC2B
NELL2	CALR	RPL23A	CLEC2D
NOP53	CARHSP1	RPL3	CMC1
NOSIP	CBX3	RPL32	CST7
NPM1	CBX5	RPL34	CTSW
NUCB2	CCDC167	RPL36	CX3CR1
OXNAD1	CCL5	RPL36A	CXCR4
PIK3IP1	CCT4	RPLP0	DSTN
RCAN3	CCT5	RPS12	DUSP2
RGS10	CD2	RPS18	EFHD2
RPL10	CD3D	RPS19	ETS1
RPL10A	CD3E	RPS20	EZR
RPL12	CD3G	RPS25	FCGR3A
RPL13	CD52	RPS26	FCRL6
RPL13A	CD8A	RPS27	FGFBP2
RPL14	CD8B	RPS27A	FYN
RPL18	CD99	RPS29	GNLY
RPL18A	CDC25B	RPS3	GZMA
RPL19	CDCA7	RPS3A	GZMB
RPL21	CDK2AP2	RPS5	GZMH
RPL22	CDT1	RPS6	GZMK
RPL23	CENPF	RPS8	GZMM
RPL23A	CENPK	RPSA	HCST
RPL3	CENPU	SARAF	HLA-A
RPL30	CENPX	SNHG8	HLA-B
RPL31	CEP78	TCF7	HLA-C
RPL32	CFL1	TRAC	HOPX
RPL34	CHAF1A	TRBC2	IFITM2
RPL35A	CHCHD2	ZFP36L2	IKZF2
RPL36	CHEK1		IKZF3
RPL36A	CLIC1		IL2RG
RPL38	CLSPN		IL32
RPL5	CORO1A		IL7R
RPL7	COX5A		ITGAL
RPL9	COX6A1		ITGB1
RPLP0	COX6C		JUNB
RPLP2	COX7A2		KLRC2
RPS10	COX7B		KLRD1
RPS12	COX8A		KLRG1
RPS13	CRIP1		LCK
RPS14	CST7		LEF1
RPS15A	CTSW		LINC01871
RPS16	CYTOR		LITAF
RPS17	DBI		LYAR
RPS18	DEK		MALAT1
RPS19	DHFR		MBP
RPS2	DNAJC9		MYBL1
RPS20	DNMT1		NCR3
RPS21	DSTN		NKG7
RPS23	DUT		NUCB2
RPS25	E2F1		PIK3R1
RPS27	EBP		PPP2R5C
RPS27A	EIF2S2		PRF1
RPS28	EIF5A		PRSS23
RPS29	EIF5B		PTPRC
RPS3	ENO1		PYHIN1
RPS3A	ERH		RAP1B
RPS4X	EZH2		RARRES3
RPS4Y1	EZR		RNF213
RPS5	FABP5		RORA
RPS6	FDPS		RUNX3
RPS8	FEN1		SAMD3
RPSA	FGFBP2		SLC9A3R1
SARAF	FLNA		SPN
SLFN5	GAPDH		STK17A
SNHG8	GINS2		SYNE1
STK17A	GNLY		SYNE2
TCF7	GUK1		TBX21
TRABD2A	GZMA		TCF7
TRAC	GZMB		TGFBR3
TRAF3IP3	GZMH		TPST2
TRBC2	GZMM		TRAC
	H2AFV		TRBC2
	H2AFZ		TRGC2
	HDAC1		TXNIP
	HELLS		ZBTB38
	HIST1H1B		ZFP36L2
	HIST1H1D		ZNF683
	HIST1H4C
	HMGA1
	HMGB1
	HMGB2
	HMGN1
	HMGN2
	HNRNPA2B1
	HNRNPA3
	HNRNPAB
	HNRNPC
	HNRNPD
	HNRNPF
	HNRNPM
	HNRNPR
	HOPX
	HSP90AA1
	HSPA8
	HSPD1
	HSPE1
	IDH2
	IFI16
	IL2RG
	IL32
	ITGB1
	ITGB3BP
	JPT1
	KLRD1
	LCK
	LCP1
	LDHA
	LIG1
	LINC01871
	LMNB1
	LSM3
	LSM4
	LY6E
	LYAR
	MAD2L1
	MCM3
	MCM4
	MCM5
	MCM6
	MCM7
	MIR4435-2HG
	MKI67
	MRPL51
	MSN
	MT1E
	MT2A
	MYL6
	MZT2A
	MZT2B
	NAA38
	NAP1L4
	NASP
	NCL
	NDUFA12
	NDUFA4
	NDUFA6
	NDUFB2
	NDUFB3
	NDUFB7
	NDUFS6
	NDUFV2
	NKG7
	NOP56
	NUCB2
	NUCKS1
	NUDC
	NUDT1
	NUSAP1
	P4HB
	PA2G4
	PARK7
	PARP1
	PCLAF
	PCNA
	PDCD5
	PDIA3
	PDIA6
	PFN1
	PGAM1
	PHF19
	POMP
	PPIA
	PPIB
	PPM1G
	PPP1CA
	PPP2R5C
	PRDX1
	PRDX2
	PRF1
	PRKDC
	PSIP1
	PSMA2
	PSMA3
	PSMA4
	PSMA5
	PSMA7
	PSMB6
	PSMB8
	PSMB9
	PSMD8
	PSME1
	PSME2
	PTMA
	PTTG1
	PYHIN1
	RAD21
	RAN
	RANBP1
	RBBP7
	RBX1
	RECQL
	RFC1
	RFC4
	RNASEH2B
	RPA3
	RRM1
	RRM2
	S100A10
	SAMD3
	SEM1
	SERBP1
	SET
	SH2D1A
	SH3BGRL3
	SIVA1
	SKA2
	SKAP1
	SLBP
	SLC25A5
	SLC9A3R1
	SMC1A
	SMC2
	SMC3
	SMC4
	SNRPB
	SNRPD1
	SNRPD3
	SNRPE
	SNRPF
	SNRPG
	SPCS2
	SRP9
	SRSF10
	SRSF2
	SRSF3
	SRSF7
	SSRP1
	STMN1
	SUB1
	SUPT16H
	SYNE2
	TAGLN2
	TAP1
	TFDP1
	TK1
	TMEM106C
	TMEM160
	TMPO
	TOP2A
	TOPBP1
	TPI1
	TPM3
	TPM4
	TPR
	TRAC
	TRBC2
	TRGC2
	TUBA1B
	TUBB
	TUBB4B
	TXN
	TXNDC17
	TYMS
	UBB
	UBL5
	UQCRQ
	USP1
	VDAC1
	WDR76
	XRCC5
	XRCC6
	YBX1
	YWHAQ

## Sheet: breast_malignant
GM1	GM2	GM3	GM5	GM6	GM7
ATF3	ABRACL	ACTA2	ACADSB	AGR2	AKAP9
BAMBI	AHCY	ANXA1	AHNAK	AZGP1	ANKRD30A
BRD2	AP1S1	APOE	AMFR	BST2	ARGLU1
BTG2	APOD	B2M	ANPEP	CD59	BRD2
CCNL1	ATOX1	BST2	APLP2	CD63	CCNL1
CEBPD	ATP5A1	CALD1	ARMT1	CD74	CELF1
CLDN4	ATP5B	CAV1	ASS1	CD9	CLDN4
CTD-3252C9.4	ATP5C1	CCL4	CCND1	CFD	DDIT3
DNAJB1	ATP5E	CCL5	CDV3	CLU	DSC2
DNAJB4	ATP5F1	CD52	CERS6	CRABP2	ELF3
DUSP1	ATPIF1	CD69	CLTC	CTSD	FOSB
EFNA1	AZGP1	CD74	CROT	DDIT4	FUS
EGR1	C14orf2	CXCR4	CTSD	FXYD3	GTF2I
ELF3	CANX	DUSP1	CYP4X1	FXYD5	H1FX
FOS	CCT3	FN1	CYP4Z1	HLA-A	HSPA1A
FOSB	CHCHD10	GSN	DHRS2	HLA-B	HSPA1B
GADD45B	DAD1	HLA-A	FASN	HLA-C	KCNQ1OT1
GPRC5A	DCXR	HLA-B	FOXA1	HLA-DRA	LPIN1
HSPA1A	DDIT4	HLA-C	GATA3	IFITM2	MACF1
HSPA1B	EIF3L	HLA-DPA1	GJA1	IFITM3	MAFB
HSPB1	GSTM3	HLA-DPB1	H2AFJ	ITM2B	MALAT1
IER2	MGP	HLA-DRA	IDH1	KRT19	MT-ND6
IER3	MRPL24	HLA-DRB1	IFI27	LAPTM4A	MTRNR2L12
IRF1	NDUFA4	HLA-E	IFITM1	LGALS1	N4BP2L2
JUN	NDUFA8	IFI27	IFITM2	LGALS3	NDRG1
JUNB	NDUFAB1	IFI6	LGALS3BP	LTF	NEAT1
KLF4	NHP2	IFITM1	LRRC26	LY6E	NFIA
KLF6	NME1	IFITM2	LTF	MDK	NUPR1
LMNA	NQO1	IFITM3	MAGED2	NUCB2	PDIA6
MAFF	PAFAH1B3	IGFBP7	MCCC2	NUPR1	PNISR
MAP3K8	PGD	IL32	MGP	PDIA3	PRLR
MCL1	PIP	ISG15	MUCL1	PDZK1IP1	PRRC2C
MYC	POLR2I	LAPTM5	MYBPC1	PPIB	RBM39
NEAT1	PRDX1	MYL9	NAT1	RABAC1	RGS16
NFKBIA	PRDX2	PSMB9	PBX1	RARRES1	RHOB
NFKBIZ	PRDX3	RGCC	PDCD4	S100A10	RNMT
NR4A1	RAB25	RGS1	PDZK1	S100A13	RRBP1
PHLDA2	RBM3	S100A4	PIP	S100A14	RSRP1
PNRC1	RBX1	SERPING1	SCGB1D2	S100A16	SEPP1
PPP1R15A	REEP5	SLC2A3	SCGB2A2	S100A6	SLC38A2
RASD1	RPL34	SPARC	SEMA3C	S100A9	SOX4
RHOB	RPN2	SPARCL1	SEPP1	SCGB2A2	SOX9
SAT1	SEC61G	SRGN	SLC39A6	SELM	SUCO
SERTAD1	SH3BGRL	STAT1	SLC4A7	SLPI	SUGP2
TOB1	SLC50A1	TAGLN	SLC9A3R1	SPTSSB	TAF1D
TRIB1	SSR2	TIMP1	STC2	SSR4	VEGFA
TSC22D1	TIMM8B	TMSB4X	SUB1	TFF3	VMP1
ZFP36	TIMP1	TPM2	TBC1D9	TIMP1	XIST
ZFP36L1	USMG5	UBE2L6	TFF3	TMED3	ZFAS1
ZFP36L2	VPS29	VIM	VTCN1	TMED9	ZNF83

## Sheet: luad_kim_malignant
ts1	ts2	ts3
C16orf89	AGR2	AGR3
C4BPA	ANXA2	AKAP9
C8orf4	C15orf48	APOD
CTSH	CDKN2A	C11orf88
HOPX	CLDN3	C1orf194
NAPSA	COL1A1	C20orf85
PIGR	CRIP2	C5orf49
SCGB3A1	CSTB	C9orf116
SCGB3A2	HMGA1	C9orf135
SERPINA1	HN1	C9orf24
SFTA1P	IFI27	CALM1
SFTPA1	IGFBP3	CAPS
SFTPA2	ISG15	CAPSL
SFTPB	KRT19	CCDC170
SFTPC	KRT7	CETN2
SFTPD	MARCKSL1	CFAP126
SLC34A2	MDK	CYSTM1
SLPI	PTGS2	DNAAF1
TFPI	RAC1	DYNLL1
	S100A16	DYNLRB2
	S100A2	EFHC1
	S100A4	FAM183A
	SOX4	FAM229B
	SPATS2L	FOXJ1
	SPINT2	HMGN3
	TAGLN2	IGFBP7
	TMSB10	IK
	TUBB	KIF9
		LHX9
		LRRIQ1
		MAP1B
		MGST3
		MORN2
		MPC2
		PCSK1N
		PIFO
		PIGR
		PSENEN
		RIIAD1
		ROPN1L
		RSPH1
		S100A11
		SLPI
		STOM
		TAGLN2
		TPPP3
		TSPAN1
		TUBB4B
		UBB
		UFC1

## Sheet: ovarian_malignant
Cancer.cell.1	Cancer.cell.2	Cancer.cell.3	Cancer.cell.4	Cancer.cell.5	Cancer.cell.6	Cycling.cancer.cell.1	Cycling.cancer.cell.2
CRABP1	ADIRF	B2M	ACTA2	AC004540.2	ADM	ANP32E	ASPM
DAPL1	ANXA1	BIRC3	AEBP1	ARMC3	AKAP12	ARL6IP1	ATAD2
SCGB1D2	ANXA2	BST2	ANXA2	ATP5MC2	ANGPTL4	ASPM	CDK1
SCGB2A1	C15orf48	CCL20	BGN	C17orf97	ANKRD37	AURKA	CENPF
THSD4	C19orf33	CXCL10	CALD1	C2orf40	BNIP3	BIRC5	CENPW
	CAMK2N1	CXCL11	CAV1	CAPS	BNIP3L	CCNB1	CENPX
	CAST	CXCL2	CCDC80	CASC1	C4orf3	CCNB2	CKS1B
	CCND1	CXCL8	CDH6	CCND1	CA9	CDC20	CLSPN
	CLDN4	DDX58	COL1A1	CD177	CEBPB	CDKN3	DEK
	CRYAB	GBP1	COL1A2	CETN2	DDIT3	CENPA	DHFR
	CST6	GBP4	COL3A1	CFAP126	DDIT4	CENPE	DNMT1
	CTSD	HERC5	COL5A1	CFAP54	EGLN3	CENPF	DTYMK
	EMP1	HLA-A	COL5A2	COMP	EIF1	CENPW	DUT
	EZR	HLA-B	COL6A1	ENKUR	EIF4EBP1	CEP55	E2F1
	FTH1	HLA-C	COL6A2	FAM183A	ENO1	CKS1B	FANCI
	FXYD3	IDO1	COL6A3	FAM81B	ERO1A	CKS2	H2AFZ
	GPRC5A	IFI16	COL8A1	FMOD	FAM162A	DLGAP5	HELLS
	HEBP2	IFI27	CTHRC1	GRIA2	FTH1	ECT2	HIST1H4C
	IGFBP3	IFI44	DCN	HYDIN	FTL	H2AFV	HMGB1
	ITGB8	IFI44L	ERP27	LDHB	GAPDH	H2AFZ	HMGB2
	KRT17	IFI6	FN1	LMO3	GDF15	HMGB1	HMGN2
	KRT19	IFIH1	FTH1	LRRIQ1	GPI	HMGB2	MAD2L1
	KRT7	IFIT1	HTRA1	MEG3	HILPDA	HMGB3	MCM3
	LCN2	IFIT2	IGFBP4	MFAP5	IGF2-1	HMGN2	MCM4
	LGALS3	IFIT3	IGFBP6	MLF1	IGFBP3	HMMR	MCM7
	LYPD2	IL32	IGFBP7	MNS1	LDHA	JPT1	MKI67
	MAL2	IRF1	KRT19	NAP1L1	MALAT1	KIF20B	MYBL2
	MFGE8	ISG15	KRT7	NKAIN4	NDRG1	KIF23	NASP
	MMP7	ISG20	LGALS1	PEG10	NDUFA4L2	KPNA2	NUSAP1
	MUC16	LAP3	LRRC75A	PIFO	NUPR1	LGALS1	ORC6
	MUC4	LY6E	LUM	PLTP	NXPH4	MAD2L1	PCLAF
	PERP	MX1	MGP	PON1	P4HA1	MKI67	PCNA
	RAB11FIP1	NFKBIA	MMP11	PPIL6	PGK1	NCAPD2	PRKDC
	RARRES1	OAS1	MMP2	PRELP	PLIN2	NMU	RAD51AP1
	S100A10	OAS2	NBL1	PREX2	PLOD2	NUCKS1	RANBP1
	S100A11	OAS3	NNMT	PTMS	RNASET2	NUSAP1	RRM2
	S100A16	PARP14	PLA2G2A	RPGR	S100A10	PTMS	SMC2
	S100A2	PLSCR1	POSTN	S100A4	SEC61G	PTTG1	SMC4
	S100A6	PSMB9	RARRES2	SELENOP	SLC16A3	RAD21	STMN1
	S100A9	RNF213	SCGB1D2	SEMA3E	SLC2A1	SKA2	TK1
	SCEL	RSAD2	SERPINF1	SLITRK6	SLC3A2	SMC4	TMEM106C
	SLPI	SAMD9	SPARC	SNHG19	SNHG7	STMN1	TMPO
	SOX4	SOD2	SPARCL1	SNHG9	SOX4	TOP2A	TOP2A
	SVIL	STAT1	SPON2	SPAG17	SQSTM1	TPX2	TPX2
	TACSTD2	TAP1	SYT8	SPEF2	SST	TROAP	TUBA1B
	TAGLN	TNFAIP2	TAGLN	SPRY1	STC2	TUBA1B	TUBB
	TFPI2	TNFSF10	TIMP3	SPX	TRIB3	TUBA1C	TYMS
	TGM2	UBE2L6	TPM1	STK38L	VEGFA	TUBB4B	UBE2C
	TNFRSF12A	WARS	VCAN	TMEM100	WSB1	UBE2C	UBE2T
	UPK1B	XAF1	VIM	TTYH1	ZFAS1	UBE2S	ZWINT

## Sheet: skin_malignant
TSK	Tumor KC Basal	Tumor KC Cycling	Tumor KC Diff
ACTB	ALDH3A1	ACAT2	AKR1B10
ADIRF	ANTXR1	ANLN	ALDH2
ANXA1	APP	ANP32B	ALDH3B2
ANXA3	ARID5B	ANP32E	APOE
ANXA5	ARPC1B	ANXA5	AQP3
AREG	ASCL2	ARHGAP11A	C10orf99
ARPC1B	ASPN	ARL6IP1	CA2
ATP1B1	ASS1	ASF1B	CALML3
BMP1	ATP1B3	ASPM	CALML5
BSG	B2M	ATAD2	CAPNS2
C16orf74	C12orf75	AURKA	CRABP2
CAP1	C1R	AURKB	CSTB
CAPN2	C1S	BCL2L12	CTSC
CAV1	CAV1	BIRC5	CTSL
CD151	CBR1	BRCA2	CYB5A
CD63	CCL2	BUB1	DBI
CD99	CCL27	BUB1B	DEFB1
CFL1	CCNI	BUB3	DMKN
CLIC1	CD74	CACYBP	DSC2
COL17A1	CDH13	CALM2	DSC3
COL5A2	CLSTN1	CASC5	DSG1
CTSV	COL17A1	CBX3	DSG3
DSG2	COL18A1	CBX5	DSP
ECM1	CXADR	CCDC34	EMP2
EMP3	CXCL14	CCNA2	F12
EREG	CYR61	CCNB1	FABP5
F3	DAPL1	CCNB2	FAM46B
FEZ1	DCN	CCT5	FAM84A
FSCN1	DST	CDC20	FGFBP1
FST	EEF1A1	CDC25B	GLTP
FSTL3	EIF3E	CDCA2	GPX2
FXYD5	ERAP2	CDCA3	GSTA4
GJB6	FHL2	CDCA4	HES2
GLIPR1	FOS	CDCA5	IVL
GLO1	FTL	CDCA8	JUP
IGFBP2	GAMT	CDK1	KCNK7
IGFBP6	GAS1	CDK4	KRT1
IL24	GBP2	CDKN3	KRT10
INHBA	GLTSCR2	CDT1	KRT16
ITGA5	GLUL	CENPA	KRT6A
ITGA6	GPX1	CENPE	KRT6B
ITGB1	GPX4	CENPF	KRT6C
KCNMA1	H3F3A	CENPH	LAD1
KRT17	HLA-A	CENPK	LGALS7
KRT18	HLA-B	CENPM	LGALS7B
LAMA3	HLA-C	CENPN	LY6D
LAMB3	HLA-DRB1	CENPU	LYPD3
LAMC2	HLA-F	CENPW	MAL2
LGALS1	HOPX	CEP55	MGST1
LTBP1	HTRA1	CKAP2	MT1X
MAGEA4	IFI16	CKLF	NOTCH3
MBOAT2	IFI44L	CKS1B	NRARP
MET	IFIT3	CKS2	NSG1
MMP1	IFITM1	CLSPN	PDZK1IP1
MYL12A	IFITM2	CRNDE	PERP
NEFM	IFITM3	CSE1L	PHLDA2
NT5E	IGFBP5	DBF4	PKP1
OCIAD2	IGFBP7	DDX39A	PTGS1
ODC1	IMPA2	DEK	PVRL1
P4HA2	IRF1	DEPDC1	PVRL4
PDLIM7	ITGB4	DEPDC1B	PYCARD
PDPN	JUN	DHFR	RAB25
PFN1	JUNB	DIAPH3	RHOV
PHLDA1	KRT15	DLGAP5	S100A11
PKM	LIMA1	DNAJC9	S100A14
PLAU	LTF	DNMT1	S100A16
PLEK2	LY6E	DTYMK	S100A7
PLOD3	MALAT1	DUT	S100A8
PRDX5	MIR205HG	ECT2	S100A9
PRKCDBP	MMP3	ESCO2	SBSN
PTHLH	MOXD1	EXOSC8	SERPINB1
RAB32	MT2A	FAM111B	SERPINB3
RBP1	NCOA7	FAM83D	SERPINB4
RHOC	NFIB	FANCI	SFN
S100A10	NFKBIA	FEN1	SLPI
S100A2	NINJ1	GGCT	SOSTDC1
S100A6	PDLIM1	GGH	SULT2B1
SCG5	PIK3R1	GINS2	TACSTD2
SDC1	PNRC1	GMNN	TCN1
SERINC2	PSMB9	GPSM2	THBD
SERPINE1	PSME1	GTSE1	TMEM154
SERPINE2	PTRF	H2AFV	TMEM45A
SH3BGRL3	RARRES3	H2AFX	TUBB2A
SLC7A8	REL	H2AFZ	ZNF750
SLITRK6	RPL34	HADH
SORL1	RPS27	HAT1
SPINK6	SDCBP	HELLS
TAGLN2	SEPP1	HIST1H1A
TGFBI	SERPINH1	HIST1H1C
TIMP3	SFRP1	HIST1H1D
TMSB10	SGK1	HIST1H1E
TMSB4X	SH3BGRL	HIST1H2AM
TNC	SH3PXD2A	HIST1H4C
TNFRSF12A	SLC25A6	HJURP
TNFRSF21	SLC2A1	HMG20B
TNNT1	SLC3A2	HMGB1
TPM4	SLC47A2	HMGB3
UPP1	SLC7A5	HMGN1
YWHAZ	SNAI2	HMGN2
	SOCS3	HMMR
	SOD1	HN1
	SOD2	HNRNPA1
	SPARC	HNRNPA2B1
	ST5	HNRNPA3
	TAP1	HNRNPAB
	TAPBP	HNRNPD
	TAX1BP3	HNRNPDL
	TGIF1	HNRNPF
	THBS2	HNRNPR
	TIMP1	HP1BP3
	TNFSF10	HSPA8
	TP63	HSPD1
	TPT1	ILF2
	TRIM47	ITGB3BP
	TXNIP	KIAA0101
	UBC	KIF11
	ZFP36L2	KIF14
		KIF20A
		KIF20B
		KIF22
		KIF23
		KIF2C
		KIF4A
		KIFC1
		KNSTRN
		KPNA2
		KPNB1
		LBR
		LDHB
		LMNB1
		LMNB2
		LRR1
		LSM2
		LSM3
		LSM4
		LSM5
		LYAR
		MAD2L1
		MCM3
		MCM5
		MCM7
		MELK
		MIS18A
		MIS18BP1
		MKI67
		MRPL51
		MT1E
		MT2A
		MYBL2
		MZT1
		NAP1L1
		NASP
		NCAPD2
		NCAPG
		NDC80
		NEK2
		NMU
		NUCKS1
		NUDT1
		NUF2
		NUP37
		NUSAP1
		OIP5
		ORC6
		PA2G4
		PARPBP
		PBK
		PCNA
		PGP
		PHF19
		PHGDH
		PKMYT1
		PLK1
		POLE3
		PRC1
		PTGES3
		PTMA
		PTMS
		PTTG1
		RACGAP1
		RAD21
		RAD51AP1
		RAN
		RANBP1
		RBBP7
		RBMX
		RFC3
		RFC4
		RHEB
		RNASEH2A
		RPA2
		RPA3
		RPL39L
		RRM1
		RRM2
		SAE1
		SFPQ
		SGOL1
		SGOL2
		SIVA1
		SKA2
		SKA3
		SLBP
		SLC25A5
		SMC2
		SMC3
		SMC4
		SNRPA1
		SNRPB
		SNRPD1
		SNRPG
		SPC25
		SRP9
		SRSF3
		SRSF7
		SSRP1
		STMN1
		STRA13
		TACC3
		TCOF1
		TFDP1
		TIMM10
		TK1
		TMEM106C
		TMEM14A
		TMPO
		TOP2A
		TPRKB
		TPX2
		TRIP13
		TROAP
		TTK
		TUBA1B
		TUBA1C
		TUBA4A
		TUBB
		TUBB4B
		TUBB6
		TUBG1
		TYMS
		U2AF1
		UBE2C
		UBE2S
		UBE2T
		USP1
		VRK1
		WDR34
		YWHAH
		ZWILCH
		ZWINT
