# Supplementary material for: Robust and efficient annotation of cell states through gene signature scoring
Source: Genome Res. 2026 Mar;36(3):630–44. doi: 10.1101/gr.280926.125 (PMC12951948; doi:10.1101/gr.280926.125)
Supplement: Supplement 4 [file Supplemental_Table_S13.xlsx]

## Sheet: Suppl. Table S13
Supplemental Table S13. Full ESCC and LUAD cancer EMT signature genes and per gene information: ESCC- and LUAD-specific cancer EMT signature. For each gene, the table indicates if it has been included in any considered pan-cancer EMT signature, in EMTome (Vasaikar et al. 2020), in dbEMT (Zhao et al. 2019), or if we have found literature associating the gene with EMT.
Gene code	Biotype	Transcription factor	# pancancer sig + # found in EMT literaure	Contained in nr. pancancer sigs	# (found in EMTome) + (found in dbEMT) + (found in Literature)	In Hallmark EMT signature	In pEMT gene module	In EMT signature Foroutan et al. 2017	In EMT signature Groeger et al. 2012	In EMT signature Hollern et al. 2018	In EMT signature Mak et al. 2016	In EMT signature Tuan et al. 2014	EMT related genes according to EMTome	EMT related genes according to EMTome: gene query link	EMT related genes according to dbEMT	EMT related genes according to dbEMT : gene query link	EMT related literature	Literature relationship gene with EMT	Notes
LAMC2	Protein coding	no	7	4	3	TRUE	TRUE	TRUE	TRUE	FALSE	FALSE	FALSE	yes	http://ec2-3-231-76-84.compute-1.amazonaws.com/emtome/query_process.php?gene=LAMC2&type=protein-coding	yes	http://www.dbemt.bioinfo-minzhao.org/gene_general.cgi?gene=3918	yes	Silencing of LAMC2 Reverses Epithelial Mesenchymal Transition and Inhibits Progression in Pancreatic Ductal Adenocarcinoma via Inactivation of the NF-κB Signaling Pathway https://doi.org/10.1615/critreveukaryotgeneexpr.2022045308
SERPINE1	Protein coding	no	7	4	3	TRUE	TRUE	TRUE	TRUE	FALSE	FALSE	FALSE	yes	http://ec2-3-231-76-84.compute-1.amazonaws.com/emtome/query_process.php?gene=SERPINE1&type=protein-coding	yes	http://www.dbemt.bioinfo-minzhao.org/gene_general.cgi?gene=5054	yes	Lots https://pubmed.ncbi.nlm.nih.gov/?term=SERPINE1+EMT+cancer
PRSS8	Protein coding	no	6	3	3	FALSE	FALSE	FALSE	FALSE	TRUE	TRUE	TRUE	yes	http://ec2-3-231-76-84.compute-1.amazonaws.com/emtome/query_process.php?gene=PRSS8&type=protein-coding	yes	http://www.dbemt.bioinfo-minzhao.org/gene_general.cgi?gene=5652	yes	Knocking down Sterol regulatory element binding protein 2 (SREBF2) inhibits the Serine Protease 8 (PRSS8) /sodium channel epithelial 1alpha subunit (SCNN1A) axis to reduce the cell proliferation, migration and epithelial-mesenchymal transformation of ovarian cancer https://doi.org/10.1080/21655979.2021.1978615 Protease Serine S1 Family Member 8 (PRSS8) Inhibits Tumor Growth In Vitro and In Vivo i…
TNC	Protein coding	no	6	3	3	TRUE	TRUE	FALSE	FALSE	FALSE	FALSE	TRUE	yes	http://ec2-3-231-76-84.compute-1.amazonaws.com/emtome/query_process.php?gene=TNC&type=protein-coding	yes	http://www.dbemt.bioinfo-minzhao.org/gene_general.cgi?gene=3371	yes	Tenascin-C is involved in promotion of cancer stemness via the Akt/HIF1ɑ axis in esophageal squamous cell carcinoma https://doi.org/10.1016/j.yexmp.2019.03.007 Distinct contributions of partial and full EMT to breast cancer malignancy https://www.cell.com/developmental-cell/pdfExtended/S1534-5807(21)00891-1
FLNA	Protein coding	no	5	2	3	TRUE	TRUE	FALSE	FALSE	FALSE	FALSE	FALSE	yes	http://ec2-3-231-76-84.compute-1.amazonaws.com/emtome/query_process.php?gene=FLNA&type=protein-coding	yes	http://www.dbemt.bioinfo-minzhao.org/gene_general.cgi?gene=2316	yes	Chromium (VI) promotes EMT by regulating FLNA in BLCA https://pubmed.ncbi.nlm.nih.gov/33978285/ FLNA promotes chemoresistance of colorectal cancer through inducing epithelial-mesenchymal transition and smad2 signaling pathway https://pubmed.ncbi.nlm.nih.gov/32195017/ TRIP13/FLNA Complex Promotes Tumor Progression and Is Associated with Unfavorable Outcomes in Melanoma https://doi.org/10.1155/2022…
ANGPTL4	Protein coding	no	4	1	3	FALSE	FALSE	TRUE	FALSE	FALSE	FALSE	FALSE	yes	http://ec2-3-231-76-84.compute-1.amazonaws.com/emtome/query_process.php?gene=ANGPTL4&type=protein-coding	yes	https://www.dbemt.bioinfo-minzhao.org/gene_general.cgi?gene=51129	yes	DNA methylation mediated down-regulation of ANGPTL4 promotes colorectal cancer metastasis by activating the ERK pathway. ("Mechanistically, ANGPTL4 induced activation of cancer-associated fibroblasts in the tumor microenvironment and promoted EMT in CRC cells through the ERK signaling pathway.") https://doi.org/10.7150/jca.52338 Oleic acid-induced NOX4 is dependent on ANGPTL4 expression to promot…
BMP2	Protein coding	no	4	1	3	FALSE	FALSE	TRUE	FALSE	FALSE	FALSE	FALSE	yes	http://ec2-3-231-76-84.compute-1.amazonaws.com/emtome/query_process.php?gene=BMP2&type=protein-coding	yes	http://www.dbemt.bioinfo-minzhao.org/gene_general.cgi?gene=650	yes	BMP-2 induces EMT and breast cancer stemness through Rb and CD44 https://pubmed.ncbi.nlm.nih.gov/28725489/ Analysis of genomics and immune infiltration patterns of epithelial-mesenchymal transition related to metastatic breast cancer to bone "Zhang et al. [19] showed that BMP-2 induced EMT in BC stem cells through Rb and CD44 signaling pathways [14,19]" https://www.sciencedirect.com/science/artic…
CAV1	Protein coding	no	4	1	3	FALSE	FALSE	FALSE	FALSE	FALSE	FALSE	TRUE	yes	http://ec2-3-231-76-84.compute-1.amazonaws.com/emtome/query_process.php?gene=CAV1&type=protein-coding	yes	http://www.dbemt.bioinfo-minzhao.org/gene_general.cgi?gene=857	yes	Rho/ROCK Pathway Regulates Migration and Invasion of Esophageal Squamous Cell Carcinoma by Regulating Caveolin-1 https://pubmed.ncbi.nlm.nih.gov/29288243/ Caveolin-1 promotes pancreatic cancer cell differentiation and restores membranous E-cadherin via suppression of the epithelial-mesenchymal transition. https://europepmc.org/article/pmc/pmc3266007
ITGA2	Protein coding	no	4	1	3	TRUE	FALSE	FALSE	FALSE	FALSE	FALSE	FALSE	yes	http://ec2-3-231-76-84.compute-1.amazonaws.com/emtome/query_process.php?gene=ITGA2&type=protein-coding	yes	http://ec2-3-231-76-84.compute-1.amazonaws.com/emtome/query_process.php?gene=ITGA2&type=protein-coding	yes	ITGA2 Overexpression Promotes Esophageal Squamous Cell Carcinoma Aggression via FAK/AKT Signaling Pathway https://pubmed.ncbi.nlm.nih.gov/34113124/ Exosomes-Mediated Transfer of Itga2 Promotes Migration and Invasion of Prostate Cancer Cells by Inducing Epithelial-Mesenchymal Transition https://pubmed.ncbi.nlm.nih.gov/32824235/
LAMA5	Protein coding	no	4	1	3	FALSE	FALSE	TRUE	FALSE	FALSE	FALSE	FALSE	yes	http://ec2-3-231-76-84.compute-1.amazonaws.com/emtome/query_process.php?gene=LAMA5&type=protein-coding	yes	http://www.dbemt.bioinfo-minzhao.org/gene_general.cgi?gene=3911	yes	Transformed MDCK cells secrete elevated MMP1 that generates LAMA5 fragments promoting endothelial cell angiogenesis https://doi.org/10.1038/srep28321
LCN2	Protein coding	no	4	1	3	FALSE	FALSE	TRUE	FALSE	FALSE	FALSE	FALSE	yes	http://ec2-3-231-76-84.compute-1.amazonaws.com/emtome/query_process.php?gene=LCN2&type=protein-coding	yes	http://www.dbemt.bioinfo-minzhao.org/gene_general.cgi?gene=3934	yes	Octreotide-Targeted Lcn2 siRNA PEGylated Liposomes as a Treatment for Metastatic Breast Cancer https://pubmed.ncbi.nlm.nih.gov/33916786/ Lipocalin 2 in cancer: when good immunity goes bad https://pubmed.ncbi.nlm.nih.gov/22075378/
TMPRSS4	Protein coding	no	4	1	3	FALSE	FALSE	FALSE	FALSE	FALSE	FALSE	TRUE	yes	http://ec2-3-231-76-84.compute-1.amazonaws.com/emtome/query_process.php?gene=TMPRSS4&type=protein-coding	yes	http://www.dbemt.bioinfo-minzhao.org/gene_general.cgi?gene=56649	yes	TMPRSS4 Upregulates TWIST1 Expression through STAT3 Activation to Induce Prostate Cancer Cell Migration https://doi.org/10.1007/s12253-017-0237-z Overexpression of TMPRSS4 promotes tumor proliferation and aggressiveness in breast cancer https://doi.org/10.3892/ijmm.2017.2893 TMPRSS4 induces cancer stem cell-like properties in lung cancer cells and correlates with ALDH expression in NSCLC patients…
VEGFA	Protein coding	no	4	1	3	TRUE	FALSE	FALSE	FALSE	FALSE	FALSE	FALSE	yes	http://ec2-3-231-76-84.compute-1.amazonaws.com/emtome/query_process.php?gene=VEGFA&type=protein-coding	yes	http://dbemt.bioinfo-minzhao.org/gene_general.cgi?gene=7422	yes	VEGF-Mediated Angiogenesis Links EMT-Induced Cancer Stemness to Tumor Initiation https://doi.org/10.1158/0008-5472.CAN-13-1641
EDN1	Protein coding	no	3	0	3	FALSE	FALSE	FALSE	FALSE	FALSE	FALSE	FALSE	yes	http://ec2-3-231-76-84.compute-1.amazonaws.com/emtome/query_process.php?gene=EDN1&type=protein-coding	yes	http://dbemt.bioinfo-minzhao.org/gene_general.cgi?gene=1906	yes	Endothelin A receptor/β-arrestin signaling to the Wnt pathway renders ovarian cancer cells resistant to chemotherapy https://doi.org/10.1158/0008-5472.can-13-3133 Functional interaction between endothelin-1 and ZEB1/YAP signaling regulates cellular plasticity and metastasis in high-grade serous ovarian cancer https://doi.org/10.1186/s13046-022-02317-1
ITGA3	Protein coding	no	3	0	3	FALSE	FALSE	FALSE	FALSE	FALSE	FALSE	FALSE	yes	http://ec2-3-231-76-84.compute-1.amazonaws.com/emtome/query_process.php?gene=ITGA3&type=protein-coding	yes	http://www.dbemt.bioinfo-minzhao.org/gene_general.cgi?gene=3675	yes	ITGA3 interacts with VASP to regulate stemness and epithelial-mesenchymal transition of breast cancer cells https://pubmed.ncbi.nlm.nih.gov/31987909/ Identification of integrin α3 as a molecular marker of cells undergoing epithelial-mesenchymal transition and of cancer cells with aggressive phenotypes. https://pubmed.ncbi.nlm.nih.gov/23786209/ CD151-α3β1 integrin complexes suppress ovarian tumor …
ITGB4	Protein coding	no	3	0	3	FALSE	FALSE	FALSE	FALSE	FALSE	FALSE	FALSE	yes	http://ec2-3-231-76-84.compute-1.amazonaws.com/emtome/query_process.php?gene=ITGB4&type=protein-coding	yes	http://www.dbemt.bioinfo-minzhao.org/gene_general.cgi?gene=3691	yes	A transcriptomic map of EGFR-induced epithelial-to-mesenchymal transition identifies prognostic and therapeutic targets for head and neck cancer https://doi.org/10.1186/s12943-022-01646-1 METTL14-mediated N6-methyladenosine modification of ITGB4 mRNA inhibits metastasis of clear cell renal cell carcinoma https://doi.org/10.1186/s12964-022-00831-5 ARRDC3 inhibits liver fibrosis and epithelial-to-m…
L1CAM	Protein coding	no	3	0	3	FALSE	FALSE	FALSE	FALSE	FALSE	FALSE	FALSE	yes	http://ec2-3-231-76-84.compute-1.amazonaws.com/emtome/query_process.php?gene=L1CAM&type=protein-coding	yes	http://www.dbemt.bioinfo-minzhao.org/gene_general.cgi?gene=3897	yes	L1CAM promotes epithelial to mesenchymal transition and formation of cancer initiating cells in human endometrial cancer. https://pubmed.ncbi.nlm.nih.gov/29456682/ Wnt/β-Catenin Target Genes in Colon Cancer Metastasis: The Special Case of L1CAM https://pubmed.ncbi.nlm.nih.gov/33228199/
MET	Protein coding	no	3	0	3	FALSE	FALSE	FALSE	FALSE	FALSE	FALSE	FALSE	yes	http://ec2-3-231-76-84.compute-1.amazonaws.com/emtome/query_process.php?gene=MET&type=protein-coding	yes	http://www.dbemt.bioinfo-minzhao.org/gene_general.cgi?gene=4233	yes	Targeting MET and AXL overcomes resistance to sunitinib therapy in renal cell carcinoma https://www.nature.com/articles/onc2015343
SCEL	Protein coding	no	3	0	3	FALSE	FALSE	FALSE	FALSE	FALSE	FALSE	FALSE	yes	http://ec2-3-231-76-84.compute-1.amazonaws.com/emtome/query_process.php?gene=SCEL&type=protein-coding	yes	http://dbemt.bioinfo-minzhao.org/gene_general.cgi?gene=8796	yes	Sciellin mediates mesenchymal-to-epithelial transition in colorectal cancer hepatic metastasis https://doi.org/10.18632/oncotarget.8264
SERPINE2	Protein coding	no	6	4	2	TRUE	TRUE	TRUE	TRUE	FALSE	FALSE	FALSE	yes	http://ec2-3-231-76-84.compute-1.amazonaws.com/emtome/query_process.php?gene=SERPINE2&type=protein-coding	no	-	yes	SERPINE2/PN-1 regulates the DNA damage response and radioresistance by activating ATM in lung cancer https://www.sciencedirect.com/science/article/pii/S0304383521005115 Single-cell RNA-seq integrated with multi-omics reveals SERPINE2 as a target for metastasis in advanced renal cell carcinoma https://www.nature.com/articles/s41419-023-05566-w SERPINE2 promotes esophageal squamous cell carcinoma m…
TGFBI	Protein coding	no	5	3	2	TRUE	TRUE	TRUE	FALSE	FALSE	FALSE	FALSE	yes	http://ec2-3-231-76-84.compute-1.amazonaws.com/emtome/query_process.php?gene=TGFBI&type=protein-coding	no	-	yes	Loss of SPDEF and gain of TGFBI activity after androgen deprivation therapy promote EMT and bone metastasis of prostate cancer https://doi.org/10.1126/scisignal.aam6826 Secreted TGF-beta-induced protein promotes aggressive progression in bladder cancer cells https://doi.org/10.2147/cmar.s208984 The LIN28B/TGF-β/TGFBI feedback loop promotes cell migration and tumour initiation potential in cholang…
AREG	Protein coding	no	4	2	2	TRUE	FALSE	TRUE	FALSE	FALSE	FALSE	FALSE	yes	http://ec2-3-231-76-84.compute-1.amazonaws.com/emtome/query_process.php?gene=AREG&type=protein-coding	no	-	yes	AREG mediates the epithelial‑mesenchymal transition in pancreatic cancer cells via the EGFR/ERK/NF‑κB signalling pathway https://pubmed.ncbi.nlm.nih.gov/32323797/ Regorafenib inhibits epithelial-mesenchymal transition and suppresses cholangiocarcinoma metastasis via YAP1-AREG axis https://pubmed.ncbi.nlm.nih.gov/35449153/
CRLF1	Protein coding	no	4	2	2	TRUE	FALSE	TRUE	FALSE	FALSE	FALSE	FALSE	yes	http://ec2-3-231-76-84.compute-1.amazonaws.com/emtome/query_process.php?gene=CRLF1&type=protein-coding	no	-	yes	AXL targeting reduces fibrosis development in experimental unilateral ureteral obstruction https://doi.org/10.14814/phy2.14091
LAMA3	Protein coding	no	4	2	2	TRUE	TRUE	FALSE	FALSE	FALSE	FALSE	FALSE	yes	http://ec2-3-231-76-84.compute-1.amazonaws.com/emtome/query_process.php?gene=LAMA3&type=protein-coding	no	-	yes	Laminin‑332 mediates proliferation, apoptosis, invasion, migration and epithelial‑to‑mesenchymal transition in pancreatic ductal adenocarcinoma https://pubmed.ncbi.nlm.nih.gov/33179081/ Identification of 9-Gene Epithelial-Mesenchymal Transition Related Signature of Osteosarcoma by Integrating Multi Cohorts https://doi.org/10.1177/1533033820980769
PLEK2	Protein coding	no	4	2	2	FALSE	TRUE	TRUE	FALSE	FALSE	FALSE	FALSE	yes	http://ec2-3-231-76-84.compute-1.amazonaws.com/emtome/query_process.php?gene=PLEK2&type=protein-coding	no	-	yes	PLEK2 promotes gallbladder cancer invasion and metastasis through EGFR/CCL2 pathway https://doi.org/10.1186/s13046-019-1250-8 PLEK2 mediates metastasis and vascular invasion via the ubiquitin-dependent degradation of SHIP2 in non-small cell lung cancer https://doi.org/10.1002/ijc.32675 Pleckstrin-2 as a Prognostic Factor and Mediator of Gastric Cancer Progression https://doi.org/10.1155/2021/5527…
TNFRSF12A	Protein coding	no	4	2	2	TRUE	TRUE	FALSE	FALSE	FALSE	FALSE	FALSE	yes	http://ec2-3-231-76-84.compute-1.amazonaws.com/emtome/query_process.php?gene=TNFRSF12A&type=protein-coding	no	-	yes	BMP2-induction of FN14 promotes protumorigenic signaling in gynecologic cancer cells https://doi.org/10.1016/j.cellsig.2021.110146 Comprehensive Integrated Single-Cell Whole Transcriptome Analysis Revealed the p-EMT Tumor Cells-CAFs Communication in Oral Squamous Cell Carcinoma https://doi.org/10.3390/ijms23126470
FLNB	Protein coding	no	3	1	2	FALSE	TRUE	FALSE	FALSE	FALSE	FALSE	FALSE	yes	http://ec2-3-231-76-84.compute-1.amazonaws.com/emtome/query_process.php?gene=FLNB&type=protein-coding	no	-	yes	An alternative splicing switch in FLNB promotes the mesenchymal cell state in human breast cancer https://pubmed.ncbi.nlm.nih.gov/30059005/ Interaction between LncRNA-ROR and miR-145 contributes to epithelial-mesenchymal transition of ovarian cancer cells https://doi.org/10.4149/gpb_2019028
ANXA3	Protein coding	no	3	1	2	FALSE	TRUE	FALSE	FALSE	FALSE	FALSE	FALSE	yes	http://ec2-3-231-76-84.compute-1.amazonaws.com/emtome/query_process.php?gene=ANXA3&type=protein-coding	no	-	yes	Overexpression of ANXA3 is an independent prognostic indicator in gastric cancer and its depletion suppresses cell proliferation and tumor growth https://pubmed.ncbi.nlm.nih.gov/27894078/ microRNA-382 suppresses the progression of pancreatic cancer through the PI3K/Akt signaling pathway by inhibition of Anxa3 https://pubmed.ncbi.nlm.nih.gov/32463333/
FGFBP1	Protein coding	no	3	1	2	FALSE	FALSE	TRUE	FALSE	FALSE	FALSE	FALSE	yes	http://ec2-3-231-76-84.compute-1.amazonaws.com/emtome/query_process.php?gene=FGFBP1&type=protein-coding	no	-	yes	FGFBP1-mediated crosstalk between fibroblasts and pancreatic cancer cells via FGF22/FGFR2 promotes invasion and metastasis of pancreatic cancer https://academic.oup.com/abbs/article/53/8/997/6297292 Hyper-O-GlcNAcylation promotes epithelial-mesenchymal transition in endometrial cancer cells https://doi.org/10.18632/oncotarget.26884
LAMB3	Protein coding	no	3	1	2	FALSE	TRUE	FALSE	FALSE	FALSE	FALSE	FALSE	yes	http://ec2-3-231-76-84.compute-1.amazonaws.com/emtome/query_process.php?gene=LAMB3&type=protein-coding	no	-	yes	https://pubmed.ncbi.nlm.nih.gov/33179081/ Laminin‑332 mediates proliferation, apoptosis, invasion, migration and epithelial‑to‑mesenchymal transition in pancreatic ductal adenocarcinoma microRNA-329 suppresses epithelial-to-mesenchymal transition and lymph node metastasis in bile duct cancer by inhibiting laminin subunit beta 3 https://doi.org/10.1002/jcp.28404
MISP	Protein coding	no	3	1	2	FALSE	FALSE	FALSE	FALSE	FALSE	FALSE	TRUE	yes	not available	no	-	yes	Up-Regulated MISP Is Associated With Poor Prognosis and Immune Infiltration in Pancreatic Ductal Adenocarcinoma https://www.frontiersin.org/articles/10.3389/fonc.2022.827051/full
MMP10	Protein coding	no	3	1	2	FALSE	FALSE	TRUE	FALSE	FALSE	FALSE	FALSE	yes	http://ec2-3-231-76-84.compute-1.amazonaws.com/emtome/query_process.php?gene=MMP10&type=protein-coding	no	-	yes	EFEMP2 increases the invasion ability of cervical cancer cells by promoting EMT via the Raf/MEK/ERK signaling pathway https://doi.org/10.4149/neo_2022_220117n74 TWIST1 upregulates matrix metalloproteinase (MMP) genes family in esophageal squamous carcinoma cells https://doi.org/10.1016/j.gep.2020.119127 Prolonged and repetitive exposure to Porphyromonas gingivalis increases aggressiveness of oral…
S100A2	Protein coding	no	3	1	2	FALSE	TRUE	FALSE	FALSE	FALSE	FALSE	FALSE	no	-	yes	http://www.dbemt.bioinfo-minzhao.org/gene_general.cgi?gene=6273	yes	miR-325-3p Promotes the Proliferation, Invasion, and EMT of Breast Cancer Cells by Directly Targeting S100A2 https://pubmed.ncbi.nlm.nih.gov/33419488/ S100A2 Silencing Relieves Epithelial-Mesenchymal Transition in Pulmonary Fibrosis by Inhibiting the Wnt/β-Catenin Signaling Pathway https://pubmed.ncbi.nlm.nih.gov/33306933/ Protumorigenic actions of S100A2 involve regulation of PI3/Akt signaling a…
TRIM29	Protein coding	no	3	1	2	FALSE	TRUE	FALSE	FALSE	FALSE	FALSE	FALSE	yes	http://ec2-3-231-76-84.compute-1.amazonaws.com/emtome/query_process.php?gene=TRIM29&type=protein-coding	no	-	yes	TRIM29 facilitates proliferation and malignancy of cholangiocarcinoma cells by activating MAPK and β-catenin pathways https://doi.org/10.1002/tox.23826 TRIM29 overexpression is associated with poor prognosis and promotes tumor progression by activating Wnt/β-catenin pathway in cervical cancer https://pubmed.ncbi.nlm.nih.gov/27081037/ TRIM29 mediates lung squamous cell carcinoma cell metastasis by…
UCHL1	Protein coding	no	3	1	2	FALSE	FALSE	FALSE	FALSE	FALSE	FALSE	TRUE	yes	http://ec2-3-231-76-84.compute-1.amazonaws.com/emtome/query_process.php?gene=UCHL1&type=protein-coding	no	-	yes	UCHL1 promotes cancer stemness in triple-negative breast cancer https://doi.org/10.1016/j.prp.2022.154235 Use of iTRAQ-based quantitative proteomic identification of CHGA and UCHL1 correlated with lymph node metastasis in colorectal carcinoma https://doi.org/10.1111/jcmm.17793 UCH-L1 promotes cancer metastasis in prostate cancer cells through EMT induction https://doi.org/10.1016/j.canlet.2011.01…
KDR (VEGFR2)	Protein coding	no	2	0	2	FALSE	FALSE	FALSE	FALSE	FALSE	FALSE	FALSE	no	-	yes	http://www.dbemt.bioinfo-minzhao.org/gene_general.cgi?gene=3791	yes	Expression and prognostic significance of VEGFR-2 in breast cancer https://pubmed.ncbi.nlm.nih.gov/25976977/ Targeting of EZH2 inhibits epithelial‑mesenchymal transition in head and neck squamous cell carcinoma via regulating the STAT3/VEGFR2 axis https://doi.org/10.3892/ijo.2019.4880 Suppression of migratory and metastatic pathways via blocking VEGFR1 and VEGFR2 https://doi.org/10.1080/10799893.…
KRT14	Protein coding	no	2	0	2	FALSE	FALSE	FALSE	FALSE	FALSE	FALSE	FALSE	yes	http://ec2-3-231-76-84.compute-1.amazonaws.com/emtome/query_process.php?gene=KRT14&type=protein-coding	no	-	yes	Pulmonary Neuroendocrine Neoplasms Overexpressing Epithelial-Mesenchymal Transition Mechanical Barriers Genes Lack Immune-Suppressive Response and Present an Increased Risk of Metastasis https://pubmed.ncbi.nlm.nih.gov/34527572/ Stress chaperone mortalin contributes to epithelial-mesenchymal transition and cancer metastasis https://pubmed.ncbi.nlm.nih.gov/26960973/
ADGRF1	Protein coding	no	2	0	2	FALSE	FALSE	FALSE	FALSE	FALSE	FALSE	FALSE	yes	-	no	-	yes	Polymorphisms in genes related to epithelial-mesenchymal transition and risk of non-small cell lung cancer https://pubmed.ncbi.nlm.nih.gov/28968839/
B3GNT3	Protein coding	no	2	0	2	FALSE	FALSE	FALSE	FALSE	FALSE	FALSE	FALSE	yes	http://ec2-3-231-76-84.compute-1.amazonaws.com/emtome/query_process.php?gene=B3GNT3&type=protein-coding	no	-	yes	B3GNT3 overexpression promotes tumor progression and inhibits infiltration of CD8 + T cells in pancreatic cancer https://pubmed.ncbi.nlm.nih.gov/33316775/ Global analysis of human glycosyltransferases reveals novel targets for pancreatic cancer pathogenesis https://pubmed.ncbi.nlm.nih.gov/32203219/
CARD10	Protein coding	no	2	0	2	FALSE	FALSE	FALSE	FALSE	FALSE	FALSE	FALSE	no	-	yes	http://dbemt.bioinfo-minzhao.org/gene_general.cgi?gene=29775	yes	CARMA3 Knockout prevented the epithelial mesenchymal transformation in bleomycin-treated mouse lung tissue. https://doi.org/10.1016/j.bbrc.2021.10.013
CX3CL1	Protein coding	no	2	0	2	FALSE	FALSE	FALSE	FALSE	FALSE	FALSE	FALSE	no	-	yes	http://www.dbemt.bioinfo-minzhao.org/gene_general.cgi?gene=6376	yes	CX3CL1 Signaling in the Tumor Microenvironment https://link.springer.com/chapter/10.1007/978-3-030-36667-4_1 CX3CL1 Promotes Breast Cancer via Transactivation of the EGF Pathway https://aacrjournals.org/cancerres/article/73/14/4461/584265/CX3CL1-Promotes-Breast-Cancer-via-Transactivation
CXCL14	Protein coding	no	2	0	2	FALSE	FALSE	FALSE	FALSE	FALSE	FALSE	FALSE	no	-	yes	http://www.dbemt.bioinfo-minzhao.org/gene_general.cgi?gene=9547	yes	Epigenetic silencing of CXCL14 induced colorectal cancer migration and invasion https://pubmed.ncbi.nlm.nih.gov/24099668/ A Novel ACKR2-Dependent Role of Fibroblast-Derived CXCL14 in Epithelial-to-Mesenchymal Transition and Metastasis of Breast Cancer https://aacrjournals.org/clincancerres/article/25/12/3702/81625/A-Novel-ACKR2-Dependent-Role-of-Fibroblast-Derived
FAM83A	Protein coding	no	2	0	2	FALSE	FALSE	FALSE	FALSE	FALSE	FALSE	FALSE	yes	http://ec2-3-231-76-84.compute-1.amazonaws.com/emtome/query_process.php?gene=FAM83A&type=protein-coding	no	-	yes	FAM83A Promotes the Proliferative and Invasive Abilities of Cervical Cancer Cells via Epithelial-Mesenchymal Transition and the Wnt Signaling Pathway https://pubmed.ncbi.nlm.nih.gov/34659522/ FAM83A Promotes Lung Cancer Progression by Regulating the Wnt and Hippo Signaling Pathways and Indicates Poor Prognosis https://pubmed.ncbi.nlm.nih.gov/32195172/ FAM83A promotes proliferation and metastasis …
MUC16	Protein coding	no	2	0	2	FALSE	FALSE	FALSE	FALSE	FALSE	FALSE	FALSE	no	-	yes	http://www.dbemt.bioinfo-minzhao.org/gene_general.cgi?gene=94025	yes	MUC16 affects the biological functions of ovarian cancer cells and induces an antitumor immune response by activating dendritic cells https://pubmed.ncbi.nlm.nih.gov/33313239/ ERO1L promotes IL6/sIL6R signaling and regulates MUC16 expression to promote CA125 secretion and the metastasis of lung cancer cells https://pubmed.ncbi.nlm.nih.gov/33056994/ Emerging role of mucins in epithelial to mesench…
SAA1	Protein coding	no	2	0	2	FALSE	FALSE	FALSE	FALSE	FALSE	FALSE	FALSE	yes	http://ec2-3-231-76-84.compute-1.amazonaws.com/emtome/query_process.php?gene=SAA1&type=protein-coding	no	-	yes	Arecoline induces epithelial-mesenchymal transformation and promotes metastasis of oral cancer by SAA1 expression https://doi.org/10.1111/cas.14866 Cancer-associated adipocytes promote pancreatic cancer progression through SAA1 expression. https://doi.org/10.1111/cas.14527 Single-cell profiling reveals that SAA1+ epithelial cells promote distant metastasis of esophageal squamous cell carcinoma ht…
SLC2A1	Protein coding	no	2	0	2	FALSE	FALSE	FALSE	FALSE	FALSE	FALSE	FALSE	no	-	yes	http://www.dbemt.bioinfo-minzhao.org/gene_general.cgi?gene=6513	yes	Hypoxia promotes the invasion and metastasis of laryngeal cancer cells via EMT https://pubmed.ncbi.nlm.nih.gov/26749588/ Development and validation of epithelial mesenchymal transition-related prognostic model for hepatocellular carcinoma https://pubmed.ncbi.nlm.nih.gov/33929972/
UPP1	Protein coding	no	2	0	2	FALSE	FALSE	FALSE	FALSE	FALSE	FALSE	FALSE	yes	http://ec2-3-231-76-84.compute-1.amazonaws.com/emtome/query_process.php?gene=UPP1&type=protein-coding	no	-	yes	Uridine phosphorylase 1 associates to biological and clinical significance in thyroid carcinoma cell lines https://pubmed.ncbi.nlm.nih.gov/31496029/ Construction of Novel Methylation-Driven Gene Model and Investigation of PARVB Function in Glioblastoma https://www.frontiersin.org/journals/oncology/articles/10.3389/fonc.2021.705547/full
CBLC	Protein coding	no	3	2	1	FALSE	FALSE	FALSE	FALSE	TRUE	FALSE	TRUE	yes	http://ec2-3-231-76-84.compute-1.amazonaws.com/emtome/query_process.php?gene=CBLC&type=protein-coding	no	-	no	-
DSG2	Protein coding	no	3	2	1	FALSE	FALSE	FALSE	FALSE	TRUE	FALSE	TRUE	yes	http://ec2-3-231-76-84.compute-1.amazonaws.com/emtome/query_process.php?gene=DSG2&type=protein-coding	no	-	no	Find only downregulation literature with EMT: Downregulation of desmoglein 2 promotes EMT progression in gallbladder cancer https://pubmed.ncbi.nlm.nih.gov/36259602/ Interplay between desmoglein2 and hypoxia controls metastasis in breast cancer https://doi.org/10.1073/pnas.2014408118 Interplay between desmoglein2 and hypoxia controls metastasis in breast cancer. https://pubmed.ncbi.nlm.nih.gov/33…	Don't understand why we found this one. it should be down-regulated. And I only took up-regulated geens.
PPL	Protein coding	no	3	2	1	FALSE	FALSE	TRUE	FALSE	FALSE	FALSE	TRUE	yes	http://ec2-3-231-76-84.compute-1.amazonaws.com/emtome/query_process.php?gene=PPL&type=protein-coding	no	-	no	Loss of periplakin expression is associated with the tumorigenesis of colorectal carcinoma https://pubmed.ncbi.nlm.nih.gov/28068625/
CDH3	Protein coding	no	2	1	1	FALSE	FALSE	FALSE	FALSE	TRUE	FALSE	FALSE	yes	http://ec2-3-231-76-84.compute-1.amazonaws.com/emtome/query_process.php?gene=CDH3&type=protein-coding	no	-	no	Pro: Downregulated CDH3 decreases proliferation, migration, and invasion in thyroid cancer https://www.ncbi.nlm.nih.gov/pmc/articles/PMC7344063/ Survival Outcomes in Cancer Patients Predicted by a Partial EMT Gene Expression Scoring Metric https://aacrjournals.org/cancerres/article/77/22/6415/623873/Survival-Outcomes-in-Cancer-Patients-Predicted-by Contra: CDH3/P-Cadherin regulates migration of H…
EVPL	Protein coding	no	2	1	1	FALSE	FALSE	FALSE	FALSE	TRUE	FALSE	FALSE	yes	http://ec2-3-231-76-84.compute-1.amazonaws.com/emtome/query_process.php?gene=EVPL&type=protein-coding	no	-	no	-
TMC5	Protein coding	no	2	1	1	FALSE	FALSE	FALSE	FALSE	FALSE	FALSE	TRUE	yes	http://ec2-3-231-76-84.compute-1.amazonaws.com/emtome/query_process.php?gene=TMC5&type=protein-coding	no	-	no	-
CDCP1	Protein coding	no	2	1	1	FALSE	FALSE	FALSE	FALSE	TRUE	FALSE	FALSE	no	-	no	-	yes	FBXL14 abolishes breast cancer progression by targeting CDCP1 for proteasomal degradation https://www.nature.com/articles/s41388-018-0372-3 CUB Domain-Containing Protein-1 Promotes Proliferation, Migration and Invasion in Cervical Cancer Cells https://doi.org/10.2147/cmar.s240107
ITGB8	Protein coding	no	2	1	1	FALSE	TRUE	FALSE	FALSE	FALSE	FALSE	FALSE	no	-	no	-	yes	Paradoxical role of β8 integrin on angiogenesis and vasculogenic mimicry in glioblastoma https://www.nature.com/articles/s41419-022-04959-7 Expression and prognostic analyses of ITGA11, ITGB4 and ITGB8 in human non-small cell lung cancer https://www.ncbi.nlm.nih.gov/pmc/articles/PMC6927340/
PHLDA2	Protein coding	no	2	1	1	FALSE	FALSE	FALSE	FALSE	FALSE	FALSE	TRUE	no	-	no	-	yes	PHLDA2 regulates EMT and autophagy in colorectal cancer via the PI3K/AKT signaling pathway https://pubmed.ncbi.nlm.nih.gov/32385195/
PLOD3	Protein coding	no	2	1	1	TRUE	FALSE	FALSE	FALSE	FALSE	FALSE	FALSE	no	-	no	-	yes	PLOD3 Is Associated with Immune Cell Infiltration and Genomic Instability in Colon Adenocarcinoma https://pubmed.ncbi.nlm.nih.gov/34239923/ Knockdown of PLOD3 suppresses the malignant progression of renal cell carcinoma via reducing TWIST1 expression https://pubmed.ncbi.nlm.nih.gov/32585183/
S100A10	Protein coding	no	2	1	1	FALSE	TRUE	FALSE	FALSE	FALSE	FALSE	FALSE	no	-	no	-	yes	The ANXA2/S100A10 Complex—Regulation of the Oncogenic Plasminogen Receptor https://www.mdpi.com/2218-273X/11/12/1772/html Membranous S100A10 involvement in the tumor budding of colorectal cancer during oncogenesis: report of two cases with immunohistochemical analysis https://pubmed.ncbi.nlm.nih.gov/33160379/
SERINC2	Protein coding	no	2	1	1	FALSE	TRUE	FALSE	FALSE	FALSE	FALSE	FALSE	no	-	no	-	yes	Catulin reporter marks a heterogeneous population of invasive breast cancer cells with some demonstrating plasticity and participating in vascular mimicry https://www.nature.com/articles/s41598-022-16802-2 SERINC2-knockdown inhibits proliferation, migration and invasion in lung adenocarcinoma https://pubmed.ncbi.nlm.nih.gov/30405754/
ABHD11-AS1	RNA, long non-coding	no	1	0	1	FALSE	FALSE	FALSE	FALSE	FALSE	FALSE	FALSE	no	-	no	-	yes	Long noncoding RNA ABHD11-AS1 predicts the prognosis of pancreatic cancer patients and serves as a promoter by activating the PI3K-AKT pathway https://pubmed.ncbi.nlm.nih.gov/30575903/
BCYRN1	RNA, long non-coding	no	1	0	1	FALSE	FALSE	FALSE	FALSE	FALSE	FALSE	FALSE	no	-	no	-	yes	Clinical significance of lncRNA BCYRN1 in colorectal cancer and its role in cell metastasis https://www.europeanreview.org/wp/wp-content/uploads/9371-9378.pdf Long Noncoding RNA BCYRN1 Promotes the Proliferation of Colorectal Cancer Cells via Up-Regulating NPR3 Expression https://www.karger.com/Article/FullText/492649 Long Noncoding RNA BCYRN1 Recruits BATF to Promote TM4SF1 Upregulation and Enha…
HHLA2	Protein coding	no	1	0	1	FALSE	FALSE	FALSE	FALSE	FALSE	FALSE	FALSE	no	-	no	-	yes	HHLA2 promotes tumor progression by long non‑coding RNA H19 in human gallbladder cancer https://doi.org/10.3892/ijo.2022.5402 HHLA2 Used as a Potential Prognostic and Immunological Biomarker and Correlated with Tumor Microenvironment in Pan-Cancer https://doi.org/10.1155/2022/3924400
KISS1	Protein coding	no	1	0	1	FALSE	FALSE	FALSE	FALSE	FALSE	FALSE	FALSE	no	-	no	-	yes	Overexpression of KiSS1 Induces the Proliferation of Hepatocarcinoma and Increases Metastatic Potential by Increasing Migratory Ability and Angiogenic Capacity https://doi.org/10.14348/molcells.2022.0105 The role of KiSS1 gene on the growth and migration of prostate cancer and the underlying molecular mechanisms https://pubmed.ncbi.nlm.nih.gov/36181862/ KiSS1-induced GPR54 signaling inhibits brea…
SPINK1	Protein coding	no	1	0	1	FALSE	FALSE	FALSE	FALSE	FALSE	FALSE	FALSE	no	-	no	-	yes	Serine protease inhibitor Kazal type 1 (SPINK1) downregulates E-cadherin and induces EMT of hepatoma cells to promote hepatocellular carcinoma metastasis via the MEK/ERK signaling pathway https://pubmed.ncbi.nlm.nih.gov/28544403/ Serine protease inhibitor Kazal type 1 promotes epithelial-mesenchymal transition through EGFR signaling pathway in prostate cancer https://pubmed.ncbi.nlm.nih.gov/24619…
COBL	Protein coding	no	1	0	1	FALSE	FALSE	FALSE	FALSE	FALSE	FALSE	FALSE	yes	http://ec2-3-231-76-84.compute-1.amazonaws.com/emtome/query_process.php?gene=COBL&type=protein-coding	no	-	no	-
CYP27B1	Protein coding	no	1	0	1	FALSE	FALSE	FALSE	FALSE	FALSE	FALSE	FALSE	yes	http://ec2-3-231-76-84.compute-1.amazonaws.com/emtome/query_process.php?gene=CYP27B1&type=protein-coding	no	-	no	MicroRNA-195 inhibits proliferation, invasion and metastasis in breast cancer cells by targeting FASN, HMGCR, ACACA and CYP27B1 https://pubmed.ncbi.nlm.nih.gov/26632252/
DFNA5 (GSDME)	Protein coding	no	1	0	1	FALSE	FALSE	FALSE	FALSE	FALSE	FALSE	FALSE	yes	not available	no	-	no	Prognostic role of DFNA5 in head and neck squamous cell carcinoma revealed by systematic expression analysis https://bmccancer.biomedcentral.com/articles/10.1186/s12885-021-08692-w Epithelial-Mesenchymal Transition Induces GSDME Transcriptional Activation for Inflammatory Pyroptosis https://www.frontiersin.org/articles/10.3389/fcell.2021.781365/full
PPP1R14C	Protein coding	no	1	0	1	FALSE	FALSE	FALSE	FALSE	FALSE	FALSE	FALSE	yes	http://ec2-3-231-76-84.compute-1.amazonaws.com/emtome/query_process.php?gene=PPP1R14C&type=protein-coding	no	-	no	Indirect:Protein phosphatase 1 regulatory inhibitor subunit 14C promotes triple‐negative breast cancer progression via sustaining inactive glycogen synthase kinase 3 beta https://www.ncbi.nlm.nih.gov/pmc/articles/PMC8797469/
AGRN	Protein coding	no	1	0	1	FALSE	FALSE	FALSE	FALSE	FALSE	FALSE	FALSE	no	-	no	-	yes	AGRN promotes lung adenocarcinoma progression by activating Notch signaling pathway and acts as a therapeutic target https://doi.org/10.1016/j.phrs.2023.106819 Proteoglycans Determine the Dynamic Landscape of EMT and Cancer Cell Stemness https://www.mdpi.com/2072-6694/14/21/5328 An oncogenic role of Agrin in regulating focal adhesion integrity in hepatocellular carcinoma "Herein we report that Ag…
ERO1A	Protein coding	no	1	0	1	FALSE	FALSE	FALSE	FALSE	FALSE	FALSE	FALSE	no	-	no	-	yes	Expression of endoplasmic reticulum oxidoreductase 1-α in cholangiocarcinoma tissues and its effects on the proliferation and migration of cholangiocarcinoma cells https://pubmed.ncbi.nlm.nih.gov/31410063/ ERO1L Promotes Hepatic Metastasis through Activating Epithelial-Mesenchymal Transition (EMT) in Pancreatic Cancer https://pubmed.ncbi.nlm.nih.gov/33681386/ Cordycepin reprogramming lipid metabo…
FBXO2	Protein coding	no	1	0	1	FALSE	FALSE	FALSE	FALSE	FALSE	FALSE	FALSE	no	-	no	-	yes	Emerging role of F-box proteins in the regulation of epithelial-mesenchymal transition and stem cells in human cancers https://www.ncbi.nlm.nih.gov/pmc/articles/PMC6472071/ FBXO2, a novel marker for metastasis in human gastric cancer https://doi.org/10.1016/j.bbrc.2017.12.097
METTL7B	Protein coding	no	1	0	1	FALSE	FALSE	FALSE	FALSE	FALSE	FALSE	FALSE	no	-	no	-	yes	METTL7B is a novel prognostic biomarker of lower-grade glioma based on pan-cancer analysis https://pubmed.ncbi.nlm.nih.gov/34281539/ METTL7B promotes migration and invasion in thyroid cancer through epithelial-mesenchymal transition https://pubmed.ncbi.nlm.nih.gov/31121562/
PITX1	Protein coding	yes	1	0	1	FALSE	FALSE	FALSE	FALSE	FALSE	FALSE	FALSE	no	-	no	-	yes	MiR-675 is frequently overexpressed in gastric cancer and enhances cell proliferation and invasion via targeting a potent anti-tumor gene PITX1 https://pubmed.ncbi.nlm.nih.gov/31260797/ Bioinformatics analysis of prognostic value of PITX1 gene in breast cancer https://doi.org/10.1042%2FBSR20202537
PPP1R14B	Protein coding	no	1	0	1	FALSE	FALSE	FALSE	FALSE	FALSE	FALSE	FALSE	no	-	no	-	yes	PPP1R14B Is a Prognostic and Immunological Biomarker in Pan-Cancer https://www.ncbi.nlm.nih.gov/pmc/articles/PMC8631915/ Epithelial–mesenchymal transition-associated secretory phenotype predicts survival in lung cancer patients https://academic.oup.com/carcin/article/35/6/1292/450544
SFN	Protein coding	no	1	0	1	FALSE	FALSE	FALSE	FALSE	FALSE	FALSE	FALSE	no	-	no	-	yes	Sulforaphane overcomes T790M-mediated gefitinib resistance in vitro through epithelial-mesenchymal transition https://pubmed.ncbi.nlm.nih.gov/35158336/ Stratifin indicates worse prognosis and promotes hepatocellular carcinoma proliferation, migration, invasion and EMT by modulating Wnt/β-catenin pathway https://doi.org/10.21203/rs.3.rs-842346/v2
SLC6A14	Protein coding	no	1	0	1	FALSE	FALSE	FALSE	FALSE	FALSE	FALSE	FALSE	no	-	no	-	yes	SLC6A14 Depletion Contributes to Amino Acid Starvation to Suppress EMT-Induced Metastasis in Gastric Cancer by Perturbing the PI3K/AKT/mTORC1 Pathway https://pubmed.ncbi.nlm.nih.gov/35865664/
SNCG	Protein coding	no	1	0	1	FALSE	FALSE	FALSE	FALSE	FALSE	FALSE	FALSE	no	-	no	-	yes	SNCG promotes the progression and metastasis of high-grade serous ovarian cancer via targeting the PI3K/AKT signaling pathway https://jeccr.biomedcentral.com/articles/10.1186/s13046-020-01589-9 Synuclein-γ promotes migration of MCF7 breast cancer cells by activating extracellular-signal regulated kinase pathway and breaking cell-cell junctions https://www.spandidos-publications.com/10.3892/mmr.20…
TNNT1	Protein coding	no	1	0	1	FALSE	FALSE	FALSE	FALSE	FALSE	FALSE	FALSE	no	-	no	-	yes	TNNT1, a prognostic indicator in colon adenocarcinoma, regulates cell behaviors and mediates EMT process https://academic.oup.com/bbb/article/84/1/111/5937607 Slow skeletal muscle troponin T acts as a potential prognostic biomarker and therapeutic target for hepatocellular carcinoma https://doi.org/10.1016/j.gene.2023.147331
UBE2C	Protein coding	no	1	0	1	FALSE	FALSE	FALSE	FALSE	FALSE	FALSE	FALSE	no	-	no	-	yes	UBE2C Is Upregulated by Estrogen and Promotes Epithelial-Mesenchymal Transition via p53 in Endometrial Cancer https://pubmed.ncbi.nlm.nih.gov/31662448/ UBE2C induces EMT through Wnt/β‑catenin and PI3K/Akt signaling pathways by regulating phosphorylation levels of Aurora-A https://pubmed.ncbi.nlm.nih.gov/28260026/
VSIG1	Protein coding	no	1	0	1	FALSE	FALSE	FALSE	FALSE	FALSE	FALSE	FALSE	no	-	no	-	yes	Interaction between cadherins, vimentin, and V-set and immunoglobulin domain containing 1 in gastric-type hepatocellular carcinoma https://doi.org/10.1007/s00418-021-02006-8
VSTM2L	Protein coding	no	1	0	1	FALSE	FALSE	FALSE	FALSE	FALSE	FALSE	FALSE	no	-	no	-	yes	VSTM2L contributes to anoikis resistance and acts as a novel biomarker for metastasis and clinical outcome in ovarian cancer https://doi.org/10.1016/j.bbrc.2023.03.073
WDR66	Protein coding	no	1	0	1	FALSE	FALSE	FALSE	FALSE	FALSE	FALSE	FALSE	no	-	no	-	yes	LIN28A-stabilized FBXL19-AS1 promotes breast cancer migration, invasion and EMT by regulating WDR66 https://link.springer.com/article/10.1007/s11626-019-00361-4 PTEN downregulates WD repeat‑containing protein 66 in salivary adenoid cystic carcinoma https://pubmed.ncbi.nlm.nih.gov/30569117/ Eukaryotic initiation Factor 4AIII facilitates hepatocellular carcinoma cell proliferation, migration, and e…
WNT7B	Protein coding	no	1	0	1	FALSE	FALSE	FALSE	FALSE	FALSE	FALSE	FALSE	no	-	no	-	yes	Activation of WNT7b autocrine eases metastasis of colorectal cancer via epithelial to mesenchymal transition and predicts poor prognosis https://pubmed.ncbi.nlm.nih.gov/33607955/ GRSF1-mediated MIR-G-1 promotes malignant behavior and nuclear autophagy by directly upregulating TMED5 and LMNB1 in cervical cancer cells https://www.tandfonline.com/doi/full/10.1080/15548627.2018.1539590
C19orf33	Protein coding	no	1	1	0	FALSE	TRUE	FALSE	FALSE	FALSE	FALSE	FALSE	no	-	no	-	no	-
MT2A	Protein coding	no	1	1	0	FALSE	TRUE	FALSE	FALSE	FALSE	FALSE	FALSE	no	-	no	-	no	Metallothionein 2A Expression in Cancer-Associated Fibroblasts and Cancer Cells Promotes Esophageal Squamous Cell Carcinoma Progression https://www.mdpi.com/2072-6694/13/18/4552/htm
AC023590.1	RNA, long non-coding	no	0	0	0	FALSE	FALSE	FALSE	FALSE	FALSE	FALSE	FALSE	no	-	no	-	no	-
CTD-2357A8.3	RNA, long non-coding	no	0	0	0	FALSE	FALSE	FALSE	FALSE	FALSE	FALSE	FALSE	no	-	no	-	no	The PI3K/Akt/mTORC signaling axis in head and neck squamous cell carcinoma: Possibilities for therapeutic interventions either as single agents or in combination with conventional therapies https://iubmb.onlinelibrary.wiley.com/doi/full/10.1002/iub.2446	hese results suggested that CAV1 may be considered as a potential target gene for CTD-2357A8.3. [...]. It has been reported that CAV1 inhibits cell migration and invasion by inhibiting epithelial mesenchymal transformation in pancreatic cancer (24).https://www.ncbi.nlm.nih.gov/pmc/articles/PMC6876322/
LA16c-431H6.6	RNA, long non-coding	no	0	0	0	FALSE	FALSE	FALSE	FALSE	FALSE	FALSE	FALSE	no	-	no	-	no	-	http://www.ensembl.org/Homo_sapiens/Gene/Summary?g=ENSG00000261732;r=16:1632259-1686715;t=ENST00000454337
RP11-431K24.1	RNA, long non-coding	no	0	0	0	FALSE	FALSE	FALSE	FALSE	FALSE	FALSE	FALSE	no	-	no	-	no	-	http://www.ensembl.org/Homo_sapiens/Gene/Summary?g=ENSG00000238290;r=1:8026738-8122702;t=ENST00000445300
RP11-462G2.1	RNA, long non-coding	no	0	0	0	FALSE	FALSE	FALSE	FALSE	FALSE	FALSE	FALSE	no	-	no	-	no	-
RP3-340N1.2	RNA, long non-coding	no	0	0	0	FALSE	FALSE	FALSE	FALSE	FALSE	FALSE	FALSE	no	-	no	-	no	https://europepmc.org/article/ppr/ppr542192
RP6-65G23.3	RNA, long intergenic non-coding	no	0	0	0	FALSE	FALSE	FALSE	FALSE	FALSE	FALSE	FALSE	no	-	no	-	no	-	https://dice-database.org/genes/RP6-65G23.3 http://grch37.ensembl.org/Homo_sapiens/Gene/Summary?db=core;g=ENSG00000259153;r=14:71276922-71282120
CRIP2	Protein coding	no	0	0	0	FALSE	FALSE	FALSE	FALSE	FALSE	FALSE	FALSE	no	-	no	-	no	SMARCD3 is a potential prognostic marker and therapeutic target in CAFs https://www.ncbi.nlm.nih.gov/pmc/articles/PMC7655158/ CSRP2 suppresses colorectal cancer progression via p130Cas/Rac1 axis-meditated ERK, PAK, and HIPPO signaling pathways https://doi.org/10.7150/thno.45674
GPR39	Protein coding	no	0	0	0	FALSE	FALSE	FALSE	FALSE	FALSE	FALSE	FALSE	no	-	no	-	no	The role of the obestatin/GPR39 system in human gastric adenocarcinomas https://pubmed.ncbi.nlm.nih.gov/26716511/ Overexpression of GPR39 contributes to malignant development of human esophageal squamous cell carcinoma https://pubmed.ncbi.nlm.nih.gov/21352519/
IL1A	Protein coding	no	0	0	0	FALSE	FALSE	FALSE	FALSE	FALSE	FALSE	FALSE	no	-	no	-	no	Indirect: miR-9 modulates the expression of interferon-regulated genes and MHC class I molecules in human nasopharyngeal carcinoma cells https://doi.org/10.1016/j.bbrc.2012.12.097
KRT81	Protein coding	no	0	0	0	FALSE	FALSE	FALSE	FALSE	FALSE	FALSE	FALSE	no	-	no	-	no	-
SPECC1	Protein coding	no	0	0	0	FALSE	FALSE	FALSE	FALSE	FALSE	FALSE	FALSE	no	-	no	-	no	-
SPNS2	Protein coding	no	0	0	0	FALSE	FALSE	FALSE	FALSE	FALSE	FALSE	FALSE	no	-	no	-	no	SPNS2 Downregulation Induces EMT and Promotes Colorectal Cancer Metastasis via Activating AKT Signaling Pathway https://pubmed.ncbi.nlm.nih.gov/34249729/
ABCA13	Protein coding	no	0	0	0	FALSE	FALSE	FALSE	FALSE	FALSE	FALSE	FALSE	no	-	no	-	no	Multi-omics Analysis Classifies Colorectal Cancer into Distinct Methylated Immunogenic and Angiogenic Subtypes Based on Anatomical Laterality https://pubmed.ncbi.nlm.nih.gov/37359923/
BAIAP3	Protein coding	no	0	0	0	FALSE	FALSE	FALSE	FALSE	FALSE	FALSE	FALSE	no	-	no	-	no	-
C2orf54 (MAB21L4)	Protein coding	no	0	0	0	FALSE	FALSE	FALSE	FALSE	FALSE	FALSE	FALSE	no	-	no	-	no	MAB21L4 regulates the TGF-β-induced expression of target genes in epidermal keratinocytes https://doi.org/10.1093/jb/mvab141
C6orf132	Protein coding	no	0	0	0	FALSE	FALSE	FALSE	FALSE	FALSE	FALSE	FALSE	no	-	no	-	no	-
CTXN1	Protein coding	no	0	0	0	FALSE	FALSE	FALSE	FALSE	FALSE	FALSE	FALSE	no	-	no	-	no	-
DNAH11	Protein coding	no	0	0	0	FALSE	FALSE	FALSE	FALSE	FALSE	FALSE	FALSE	no	-	no	-	no	-
DNAH2	Protein coding	no	0	0	0	FALSE	FALSE	FALSE	FALSE	FALSE	FALSE	FALSE	no	-	no	-	no	-
EDN2	Protein coding	no	0	0	0	FALSE	FALSE	FALSE	FALSE	FALSE	FALSE	FALSE	no	-	no	-	no	Identification and Validation of a Five-Gene Signature Associated With Overall Survival in Breast Cancer Patients https://www.frontiersin.org/articles/10.3389/fonc.2021.660242/full#f9
IL37	Protein coding	no	0	0	0	FALSE	FALSE	FALSE	FALSE	FALSE	FALSE	FALSE	no	-	no	-	no	Shoking: IL-37 suppresses migration and invasion of gallbladder cancer cells through inhibition of HIF-1α induced epithelial-mesenchymal transition https://doi.org/10.26355/eurrev_201812_16510 CCL22 and IL-37 inhibit the proliferation and epithelial-mesenchymal transition process of NSCLC A549 cells. https://doi.org/10.3892/or.2016.4995
IVL	Protein coding	no	0	0	0	FALSE	FALSE	FALSE	FALSE	FALSE	FALSE	FALSE	no	-	no	-	no	Immunolocalization of Vimentin, Keratin 17, Ki-67, Involucrin, β-Catenin and E-Cadherin in Cutaneous Squamous Cell Carcinoma https://por.hu/2014/20/2/0263/0263a.pdf
LONRF2	Protein coding	no	0	0	0	FALSE	FALSE	FALSE	FALSE	FALSE	FALSE	FALSE	no	-	no	-	no	-
MB	Protein coding	no	0	0	0	FALSE	FALSE	FALSE	FALSE	FALSE	FALSE	FALSE	no	-	no	-	no	Expression of ERCC1, TYMS, RRM1, TUBB3, non-muscle myosin II, myoglobin and MyoD1 in lung adenocarcinoma pleural effusions predicts survival in patients receiving platinum-based chemotherapy https://www.spandidos-publications.com/10.3892/mmr.2014.3141?text=fulltext
MUC21	Protein coding	no	0	0	0	FALSE	FALSE	FALSE	FALSE	FALSE	FALSE	FALSE	no	-	no	-	no	-
MUC3A	Protein coding	no	0	0	0	FALSE	FALSE	FALSE	FALSE	FALSE	FALSE	FALSE	no	-	no	-	no	-
MYLPF	Protein coding	no	0	0	0	FALSE	FALSE	FALSE	FALSE	FALSE	FALSE	FALSE	no	-	no	-	no	-
NOXO1	Protein coding	no	0	0	0	FALSE	FALSE	FALSE	FALSE	FALSE	FALSE	FALSE	no	-	no	-	no	-
NPIPB11	Protein coding	no	0	0	0	FALSE	FALSE	FALSE	FALSE	FALSE	FALSE	FALSE	no	-	no	-	no	-
OPN3	Protein coding	no	0	0	0	FALSE	FALSE	FALSE	FALSE	FALSE	FALSE	FALSE	no	-	no	-	no	-
PAEP	Protein coding	no	0	0	0	FALSE	FALSE	FALSE	FALSE	FALSE	FALSE	FALSE	no	-	no	-	no	-
PHACTR3	Protein coding	no	0	0	0	FALSE	FALSE	FALSE	FALSE	FALSE	FALSE	FALSE	no	-	no	-	no	-
PLXNB2	Protein coding	no	0	0	0	FALSE	FALSE	FALSE	FALSE	FALSE	FALSE	FALSE	no	-	no	-	no	-
PRR36	Protein coding	no	0	0	0	FALSE	FALSE	FALSE	FALSE	FALSE	FALSE	FALSE	no	-	no	-	no	-
RAMP1	Protein coding	no	0	0	0	FALSE	FALSE	FALSE	FALSE	FALSE	FALSE	FALSE	no	-	no	-	no	Neuropeptides Substance P and Calcitonin Gene Related Peptide Accelerate the Development and Fibrogenesis of Endometriosis https://www.nature.com/articles/s41598-019-39170-w
RHBDL2	Protein coding	no	0	0	0	FALSE	FALSE	FALSE	FALSE	FALSE	FALSE	FALSE	no	-	no	-	no	Role of Cadherins in Cancer—A Review https://www.mdpi.com/1422-0067/21/20/7624/htm
RNF39	Protein coding	no	0	0	0	FALSE	FALSE	FALSE	FALSE	FALSE	FALSE	FALSE	no	-	no	-	no	-
RTTN	Protein coding	no	0	0	0	FALSE	FALSE	FALSE	FALSE	FALSE	FALSE	FALSE	no	-	no	-	no	-
SAA2	Protein coding	no	0	0	0	FALSE	FALSE	FALSE	FALSE	FALSE	FALSE	FALSE	no	-	no	-	no	Serum amyloid a, a potential biomarker both in serum and tissue, correlates with ovarian cancer progression https://doi.org/10.1186/s13048-020-00669-w
SEMA3B	Protein coding	no	0	0	0	FALSE	FALSE	FALSE	FALSE	FALSE	FALSE	FALSE	no	-	no	-	no	Shoking: Appeared to be EMT inhibitor GATA3 Targets Semaphorin 3B in Mammary Epithelial Cells to Suppress Breast Cancer Progression and Metastasis https://doi.org/10.1038%2Fonc.2017.165
SHC2 (SCK)	Protein coding	no	0	0	0	FALSE	FALSE	FALSE	FALSE	FALSE	FALSE	FALSE	no	-	no	-	no	CD95 promotes metastatic spread via Sck in pancreatic ductal adenocarcinoma https://doi.org/10.1038/cdd.2014.217	RAS pathway related proteins (https://www.proteinatlas.org/ENSG00000129946-SHC2)
SPRR2D	Protein coding	no	0	0	0	FALSE	FALSE	FALSE	FALSE	FALSE	FALSE	FALSE	no	-	no	-	no	-
SYT8	Protein coding	no	0	0	0	FALSE	FALSE	FALSE	FALSE	FALSE	FALSE	FALSE	no	-	no	-	no	-
TMEM61	Protein coding	no	0	0	0	FALSE	FALSE	FALSE	FALSE	FALSE	FALSE	FALSE	no	-	no	-	no	-
TNNC2	Protein coding	no	0	0	0	FALSE	FALSE	FALSE	FALSE	FALSE	FALSE	FALSE	no	-	no	-	no	-
WFDC3	Protein coding	no	0	0	0	FALSE	FALSE	FALSE	FALSE	FALSE	FALSE	FALSE	no	-	no	-	no	-
FGD6	Protein coding	no	0	0	0	FALSE	FALSE	FALSE	FALSE	FALSE	FALSE	FALSE	no	-	no	-	no	-
RP11-350J20.12	Antisense	no	0	0	0	FALSE	FALSE	FALSE	FALSE	FALSE	FALSE	FALSE	no	-	no	-	no	-
RP11-519G16.5	Antisense	no	0	0	0	FALSE	FALSE	FALSE	FALSE	FALSE	FALSE	FALSE	no	-	no	-	no	-	http://grch37.ensembl.org/Homo_sapiens/Gene/Summary?db=core;g=ENSG00000259342;r=15:45722850-45734006;t=ENST00000559553
